# Supplementary material for: Investigations of alkynylbenziodoxole derivatives for radical alkynylations in photoredox catalysis
Source: publisher site journal article supplement (doi:10.3762/bjoc.14.103), 2018-05-28

**Supporting Information**  
**for**  
**Investigations of alkynylbenziodoxole derivatives for**  
**radical alkynylations in photoredox catalysis**

Yue Pan<sup>1,2</sup>, Kunfang Jia<sup>2</sup>, Yali Chen<sup>\*1</sup>, and Yiyun Chen<sup>\*1,2</sup>

Address: <sup>1</sup>Department of Chemistry, Shanghai University, 99 Shangda Road, Shanghai 200444 China and <sup>2</sup>State Key Laboratory of Bioorganic and Natural Products Chemistry, Centre for Excellence in Molecular Synthesis, Shanghai Institute of Organic Chemistry, University of Chinese Academy of Sciences, Chinese Academy of Sciences, 345 Lingling Road, Shanghai 200032 China

Email: Yali Chen - ylchen@staff.shu.edu.cn; Yiyun Chen - yiyunchen@sioc.ac.cn

\*Corresponding author

**Experimental details, and copies of <sup>1</sup>H NMR and <sup>13</sup>C NMR spectra**  
**for all new compounds**

|                                                         |     |
|---------------------------------------------------------|-----|
| I. General methods.....                                 | S2  |
| II. Mechanistic studies .....                           | S3  |
| III. Substrates preparation and characterization .....  | S8  |
| IV. Radical alkynylation product characterization ..... | S18 |
| V. Reference.....                                       | S24 |
| VI. NMR Spectra of new compounds.....                   | S25 |

## I. General methods.

Unless otherwise noted, all reactions of substrates preparation were conducted in flame-dried glassware under a nitrogen atmosphere using anhydrous solvent passed through an activated alumina column (Innovative Technology). Commercially available reagents were used without further purification. Thin layer chromatography (TLC) was performed using Jiangyou TLC silica gel plates HSG F<sub>254</sub> and visualized using UV light, anisaldehyde or potassium permanganate. Flash chromatography was performed on Lisure science EZ purification system using the Santai technologies silica gel cartridge. Photochemical reactions were carried with 4 W blue LED (468 nm peak wavelength, 25 nm spectral half-wave width, composed of 55–65 LED units each with 60 mW, 3 V, 20 mA) obtained from Qiding Photo Electric (analyzed by Everfine PMS-50). <sup>1</sup>H and <sup>13</sup>C NMR spectra were recorded in CDCl<sub>3</sub> or (CD<sub>3</sub>)<sub>2</sub>SO, unless otherwise noted, on a Bruker AV-400 MHz or an Agilent 500 MHz spectrometer. Chemical shifts in <sup>1</sup>H NMR spectra were reported in parts per million (ppm) on the δ scale from an internal standard of residual chloroform (7.26 ppm) or dimethyl sulfoxide (2.50 ppm). Data for <sup>1</sup>H NMR were reported as follows: chemical shift, multiplicity (s = singlet, d = doublet, t = triplet, q = quartet, m = multiplet), coupling constant in Hertz (Hz) and integration. Data for <sup>13</sup>C NMR spectra were reported in terms of chemical shift in ppm from the central peak of CDCl<sub>3</sub> (77.16 ppm) or (CD<sub>3</sub>)<sub>2</sub>SO (39.52 ppm). IR (neat) spectra were recorded on a Thermo Scientific Nicolet 380 FT-IR (neat) spectrometer. MS experiments were performed on a Bruker maXis 4G instrument for HRMS–ESI, an Agilent 5973N instrument for EI-MS, and a Waters Micromass GCT Premier instrument for HRMS–EI. Cyclic voltammetry experiments were performed on a CH Instruments Electrochemical Analyzer.

## II. Mechanistic studies

### The Luminescence quenching experiments

Emission intensities were recorded using Microplate Accessory 5JO-0139 spectrometer for all experiments. All  $\text{Ru}(\text{bpy})_3(\text{PF}_6)_2$  solutions were excited at 460 nm and the emission intensity at 600 nm was observed. In a typical experiment, the DCM solution of  $\text{Ru}(\text{bpy})_3(\text{PF}_6)_2$  ( $36 \mu\text{M}$ ) was added the appropriate amount of quencher in a screw-top 1.0 cm quartz cuvette. After degassing with nitrogen for 10 min, the emission spectra of the samples were collected.

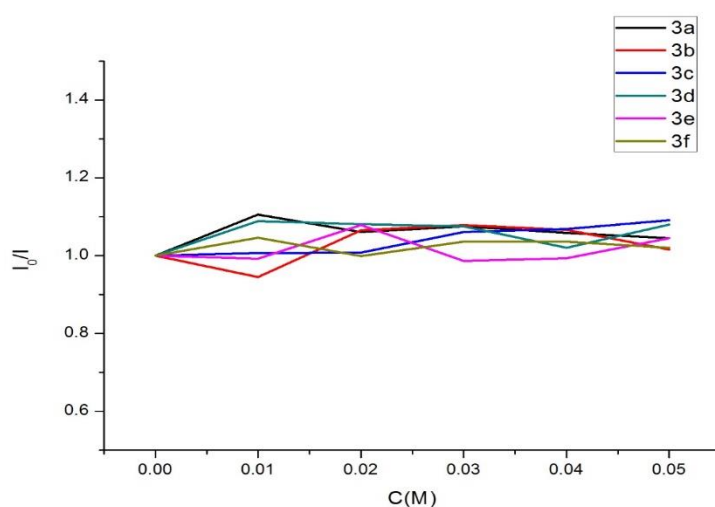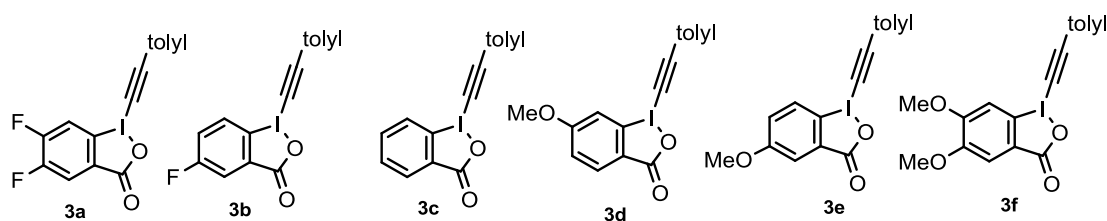

**Scheme S1:  $\text{Ru}(\text{bpy})_3(\text{PF}_6)_2$  emission quenching by BI-alkyne**

### The cyclic voltammetry experiments

Cyclic voltammetry experiments were performed on a CH Instruments Electrochemical Analyzer at room temperature under a nitrogen atmosphere. The 1mM  $\text{CH}_3\text{CN}$  solution was prepared with 100 mM tetrabutylammonium tetrafluoroborate as the supporting electrolyte, using a glassy carbon working

electrode, a Pt counter electrode, and a Hg/HgCl<sub>2</sub> reference electrode. Scan Rate (V/s) = 0.05.

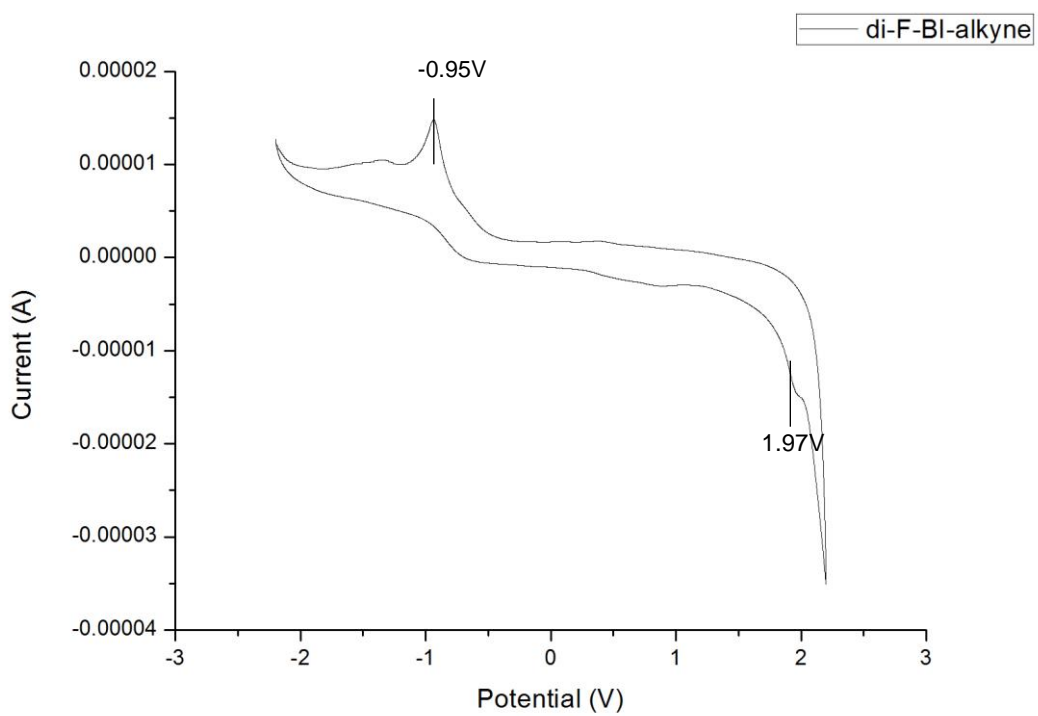

**Scheme S2: The cyclic voltammetry experiment of 3a.**

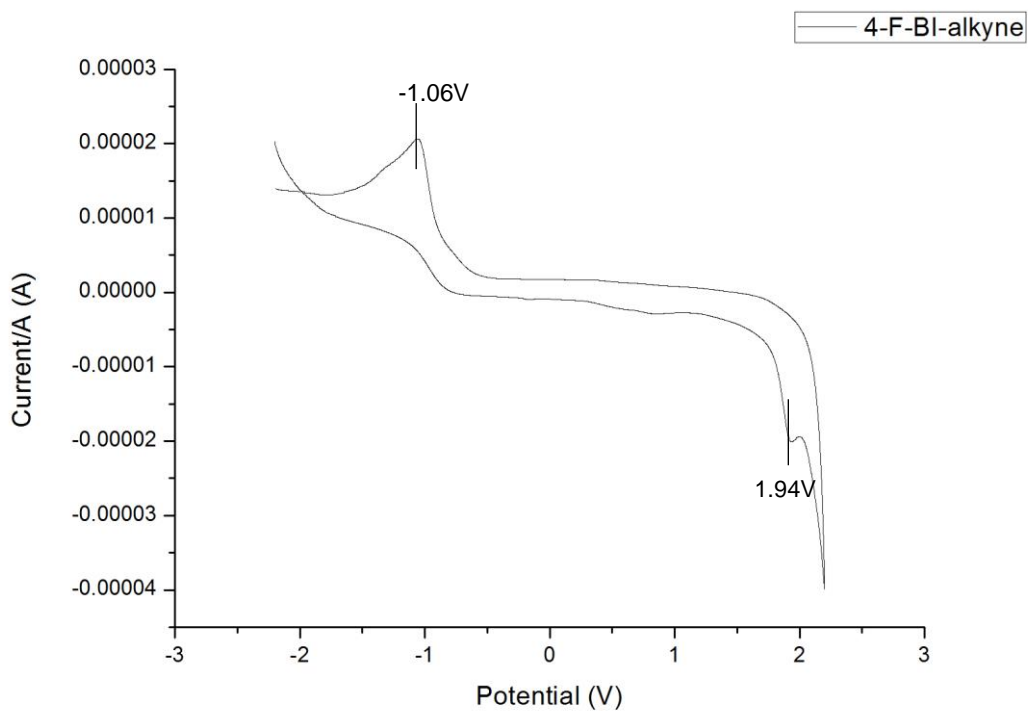

**Scheme S3: The cyclic voltammetry experiment of 3b.**

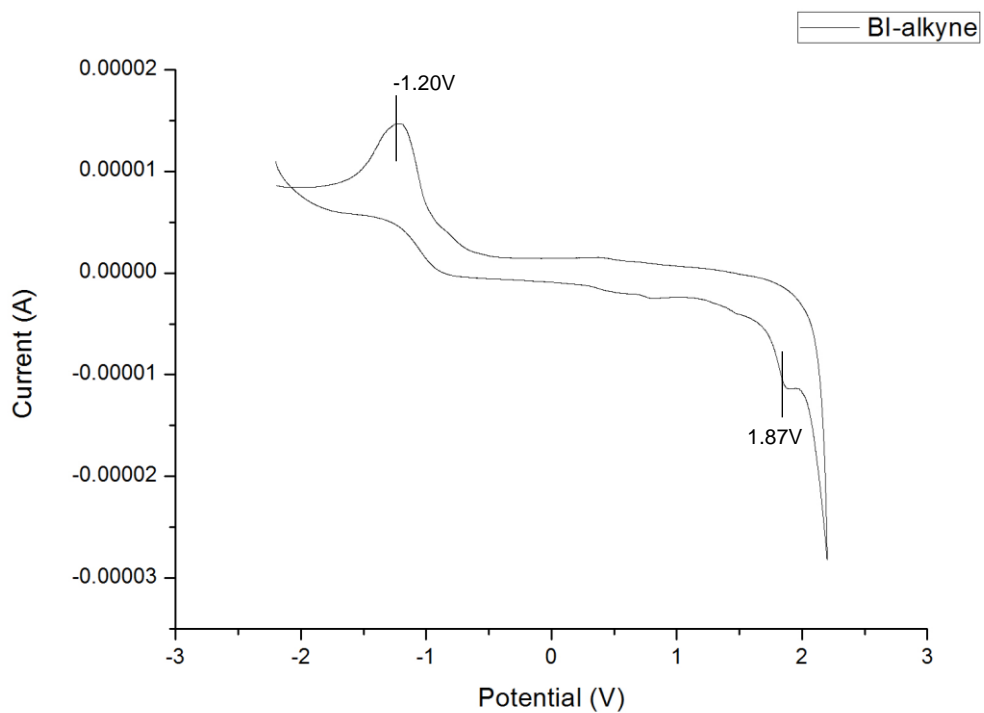

**Scheme S4: The cyclic voltammetry experiment of 3c.**

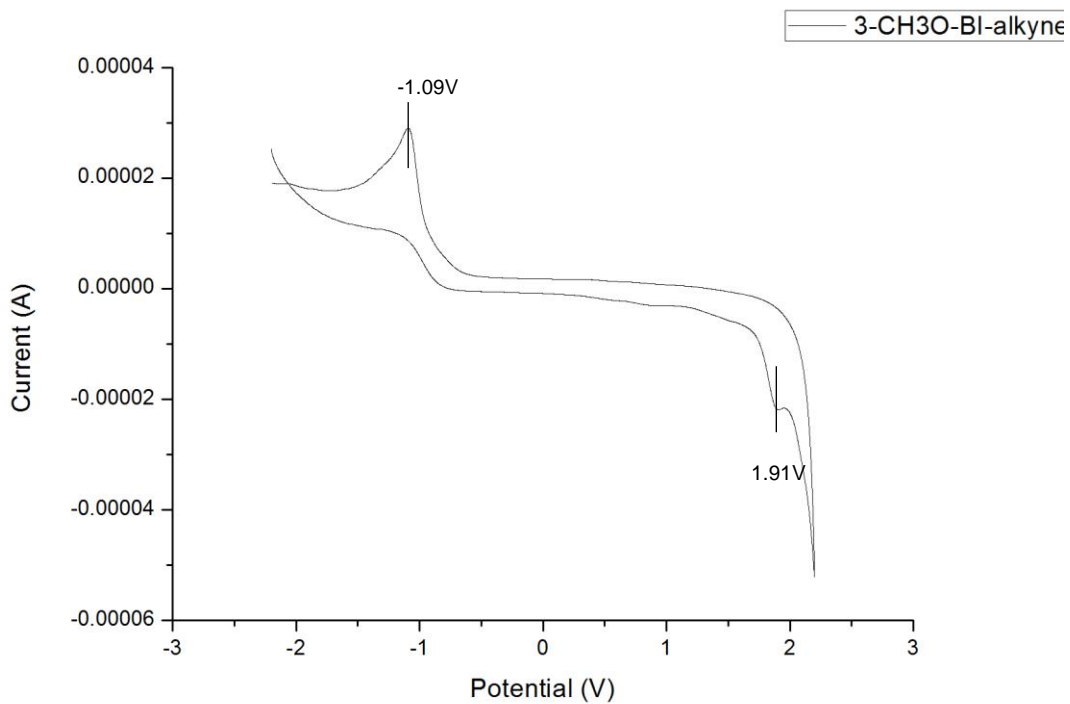

**Scheme S5: The cyclic voltammetry experiment of 3d.**

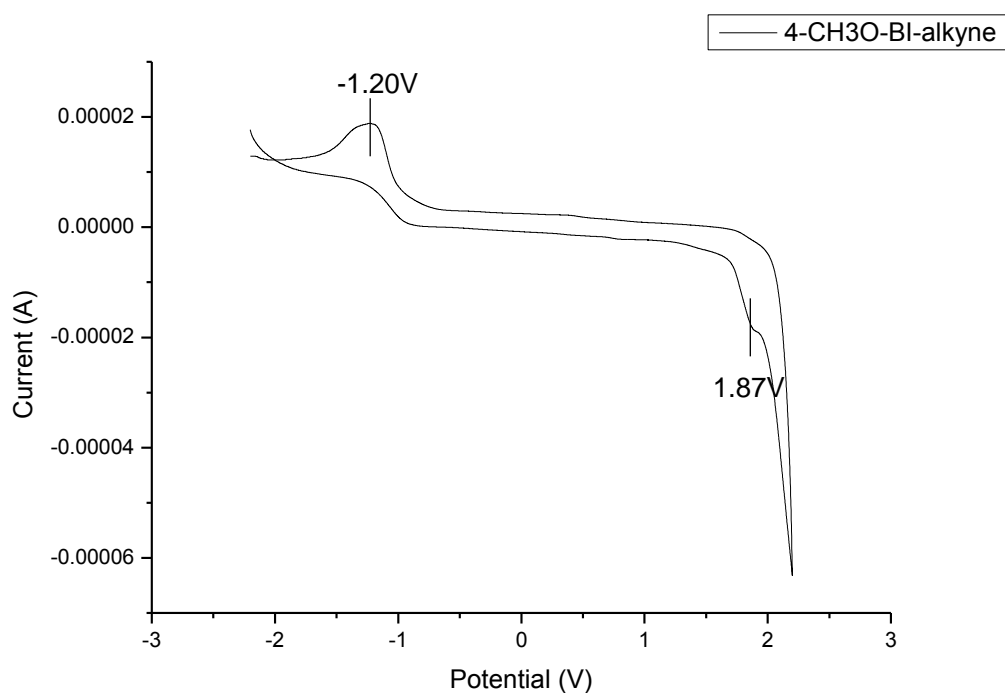

**Scheme S6: The cyclic voltammetry experiment of 3e.**

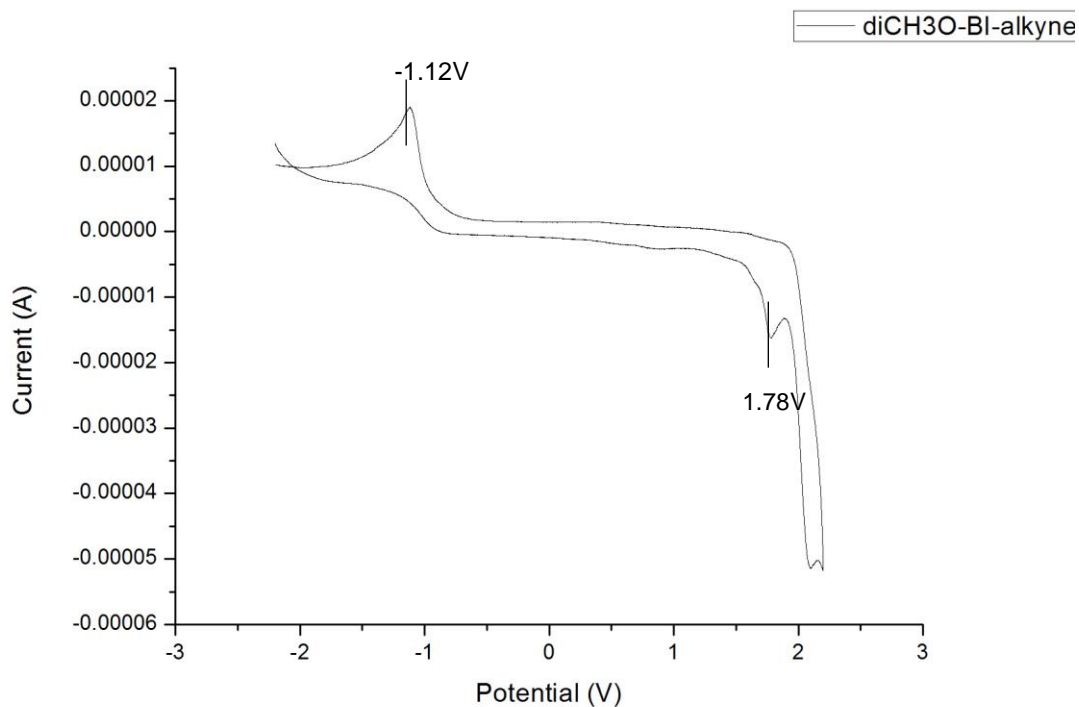

**Scheme S7: The cyclic voltammetry experiment of 3f.**

### The solubility test of alkynylbenziodoxoles

The solution was prepared from 0.05 mmol of alkynylbenziodoxole and 0.5 ml of DCM. At this concentration, **3b** and **3d** can be completely dissolved and the solution is clear; **3c** and **3e** are in a slightly turbid state, while **3a** and **3f** are not completely dissolved and the solution is cloudy.

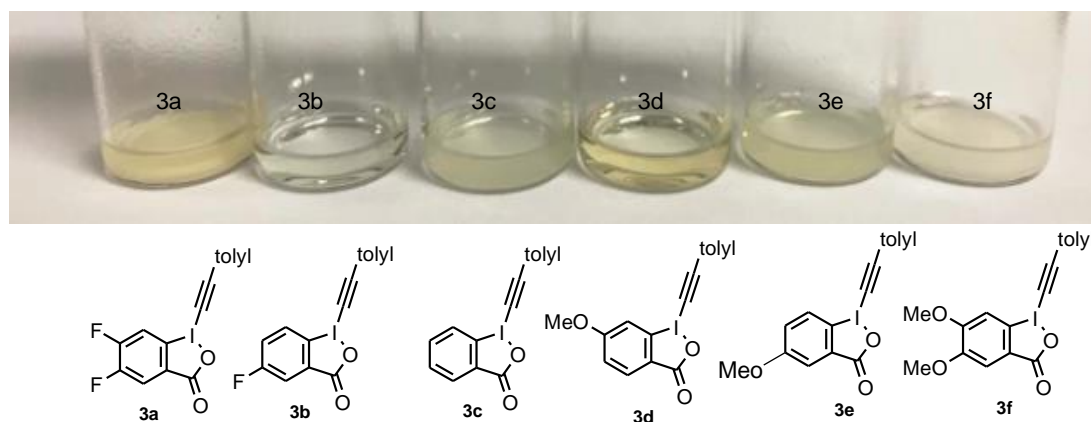

**Scheme S8: The solubility of alkynylbenziodoxoles 3a–f.**

### III. Substrates preparation and characterization

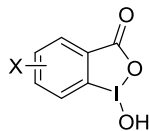

**Synthesis of hydroxybenziodoxole 2.** NaIO<sub>4</sub> (6.7 g, 31 mmol, 1.0 equiv) and 2-iodobenzoic acid (7.4 g, 30 mmol, 1.0 equiv) were suspended in 30% (v:v) aqueous acetic acid (45 mL). The reaction mixture was vigorously stirred and refluxed for 3 h protecting from light. Cold water (120 mL) was then added and allowed to cool to room temperature. After 1 h, the crude product was collected by filtration, washed with ice water (3 x 30 mL) and acetone (3 x 30 mL). After air-drying in the dark, hydroxybenziodoxole **2** was yielded as a white solid.

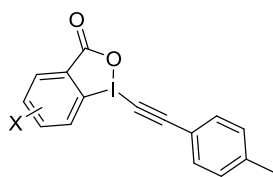

**Synthesis of alkynylbenziodoxole 3**[1]. Trimethylsilyl triflate (1.1 equiv) was added to a suspension of hydroxybenziodoxole (BI-OH, 1.0 equiv) in CH<sub>2</sub>Cl<sub>2</sub> at room temperature. The resulting yellow mixture was stirred for 1 h, followed by the addition of trimethylsilyl alkyne (1.1 equiv). After stirring for 6 h at room temperature, saturated NaHCO<sub>3</sub> (100 mL) was added and the mixture was stirred vigorously for 30 min. After filtration, the filtrate was washed with saturated NaHCO<sub>3</sub>, dried over Na<sub>2</sub>SO<sub>4</sub>, filtered and concentrated in vacuum. The resulting mixture was combined with the previously obtained solid and then recrystallized in CH<sub>3</sub>CN to afford the alkynylbenziodoxole **3**.



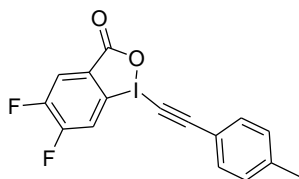

**5,6-Difluoro-1-(*p*-tolylethynyl)-1 $\lambda^3$ -benzo[*d*][1,2]iodaoxol-3(1*H*)-one (3a).**

Following the general procedure, the reaction from 5,6-difluoro hydroxybenziodoxole (0.90 g, 3.0 mmol, 1.0 equiv) and trimethyl(*p*-tolylethynyl)silane (0.62 g, 3.3 mmol, 1.1equiv) afforded alkynylbenziodoxole **3a** as a pale yellow solid (305 mg, 25% yield): IR (neat) 1624, 1599, 1484, 1408, 1300, 1282, 813, 782, 655 cm<sup>-1</sup>; <sup>1</sup>H NMR (500 MHz, (CD<sub>3</sub>)<sub>2</sub>SO)  $\delta$  8.11 (dd, *J* = 9.1, 6.7 Hz, 1H), 8.03 (dd, *J* = 9.7, 7.6 Hz, 1H), 7.60 (d, *J* = 8.1 Hz, 2H), 7.33 (d, *J* = 7.9 Hz, 2H), 2.38 (s, 3H); <sup>13</sup>C NMR (125 MHz, (CD<sub>3</sub>)<sub>2</sub>SO)  $\delta$  169.7, 159.9 – 157.8 (m), 156.8 (dd, *J* = 240.1, 13.1 Hz), 146.3, 137.8, 135.2 (dd, *J* = 5.2, 2.9 Hz), 134.9 – 134.8 (m), 124.5 (dd, *J* = 31.7, 18.8 Hz), 122.3, 122.2 (dd, *J* = 34.3, 22.8 Hz), 116.2 (d, *J* = 6.8 Hz), 110.7, 56.6, 26.4; <sup>19</sup>F NMR (375 MHz, CDCl<sub>3</sub>)  $\delta$  -125.8 (dt, *J* = 19.1, 8.0 Hz), -131.3 (ddd, *J* = 19.2, 9.3, 6.3 Hz); HRMS-ESI (m/z) [M+H]<sup>+</sup> calc'd for C<sub>16</sub>H<sub>10</sub>O<sub>2</sub>F<sub>2</sub>I, 398.9688, found 398.9700.

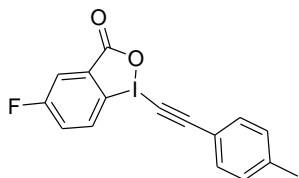

**5-Fluoro-1-(*p*-tolylethynyl)-1 $\lambda^3$ -benzo[*d*][1,2]iodaoxol-3(1*H*)-one (3b).** Following the general procedure, the reaction from 5-fluoro hydroxybenziodoxole (1.41 g, 5.0 mmol, 1.0 equiv) and trimethyl(*p*-tolylethynyl)silane (1.0 g, 5.5 mmol, 1.1 equiv) afforded alkynylbenziodoxole **3b** as a white solid (731 mg, 38% yield): IR (neat) 3069, 2921, 2154, 1628, 1578, 1508, 1453, 1415, 1257, 818, 784 cm<sup>-1</sup>; <sup>1</sup>H NMR (500 MHz, (CD<sub>3</sub>)<sub>2</sub>SO)  $\delta$  8.25 (dd, *J* = 8.9, 4.5 Hz, 1H), 7.82 (dd, *J* = 8.3, 3.0 Hz, 1H), 7.77 (ddd, *J* = 8.9, 8.2, 3.0 Hz, 1H), 7.60-7.56 (m, 2H), 7.33-7.28 (m, 2H), 2.37 (s, 3H); <sup>13</sup>C NMR (125 MHz, (CD<sub>3</sub>)<sub>2</sub>SO)  $\delta$  165.4 (d, *J* = 2.0 Hz), 164.8 (d, *J* = 249.3 Hz), 141.4, 135.4 (d, *J* = 7.1 Hz), 133.0, 130.1 (d, *J* = 8.6 Hz), 130.1, 122.7 (d, *J* = 24.0

Hz), 118.1 (d,  $J = 23.6$  Hz), 117.8, 110.4 (d,  $J = 1.9$  Hz), 105.5, 51.0, 21.6;  $^{19}\text{F}$  NMR (375MHz,  $(\text{CD}_3)_2\text{SO}$ )  $\delta$  -111.6 (tt,  $J = 8.1, 3.5$  Hz), HRMS-ESI ( $m/z$ )  $[\text{M}+\text{H}]^+$  calc'd for  $\text{C}_{16}\text{H}_{11}\text{O}_2\text{FI}$ , 380.9782, found 380.9784.

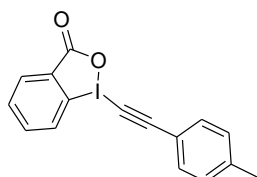

**1-(p-Tolylolethynyl)-1 $\lambda^3$ -benzo[*d*][1,2]iodaoxol-3(1*H*)-one** (**3c**) (CAS: 1433188-23-8). Following the general procedure, the reaction from hydroxybenziodoxole (1.3 g, 5.0 mmol, 1.0 equiv) and trimethyl(p-tolylolethynyl)silane (0.94 g, 5.0 mmol, 1.0 equiv) afforded alkynylbenziodoxole **3c** as a white solid (1.1 g, 59% yield):  $^1\text{H}$  NMR (500 MHz,  $\text{CDCl}_3$ )  $\delta$  8.39 (dd,  $J = 6.5, 1.3$  Hz, 1H), 8.23 (d,  $J = 7.7$  Hz, 1H), 7.79–7.69 (m, 2H), 7.48 (d,  $J = 7.6$  Hz, 2H), 7.22 (d,  $J = 7.6$  Hz, 2H), 2.41 (s, 3H);  $^{13}\text{C}$  NMR (125 MHz,  $\text{CDCl}_3$ )  $\delta$  166.8, 141.6, 134.9, 132.9, 132.5, 131.6, 131.5, 129.6, 126.4, 117.5, 116.4, 107.2, 49.3, 21.8.

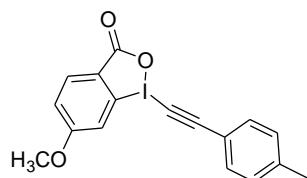

**6-Methoxy-1-(p-tolylolethynyl)-1 $\lambda^3$ -benzo[*d*][1,2]iodaoxol-3(1*H*)-one** (**3d**). Following the general procedure, the reaction from 6-methoxy-hydroxybenziodoxole (1.5 g, 5.0 mmol, 1.0 equiv) and trimethyl(p-tolylolethynyl)silane (1.2 g, 5.5 mmol, 1.1 equiv) afforded alkynylbenziodoxole **3d** as a pale yellow solid (946mg, 48% yield): IR (neat) 2146, 1597, 1556, 1482, 1305, 1265, 1233, 1205, 814, 798, 630  $\text{cm}^{-1}$ ;  $^1\text{H}$  NMR (500 MHz,  $(\text{CD}_3)_2\text{SO}$ )  $\delta$  7.98 (d,  $J = 8.4$  Hz, 1H), 7.71 (d,  $J = 2.3$  Hz, 1H), 7.59-7.54 (m, 2H), 7.31 (m, 3H), 3.86 (s, 3H), 2.36 (s, 3H);  $^{13}\text{C}$  NMR (125 MHz,  $(\text{CD}_3)_2\text{SO}$ )  $\delta$  166.7, 164.8, 141.3, 132.8, 132.5, 130.1, 125.1, 118.7, 117.8, 117.5,

112.6, 105.2, 56.4, 52.9, 21.6; HRMS-ESI (m/z) [M+H]<sup>+</sup> calc'd for C<sub>17</sub>H<sub>14</sub>O<sub>3</sub>I, 392.9982, found 392.9983.

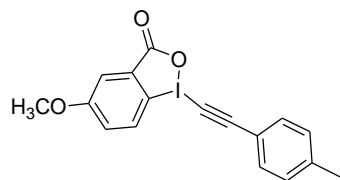

**5-Methoxy-1-(*p*-tolylethynyl)-1λ<sup>3</sup>-benzo[*d*][1,2]iodaoxol-3(1*H*)-one (3e).**

Following the general procedure, the reaction from 5-methoxy-hydroxybenziodoxole (1.5 g, 5.0 mmol, 1.0 equiv) and trimethyl(*p*-tolylethynyl)silane (1.2 g, 5.5 mmol, 1.1 equiv) afforded alkynylbenziodoxole **3e** as a white solid (1.2 g, 48% yield): IR (neat) 3481, 2148, 1723, 1617, 1574, 1507, 1462, 1409, 1315, 1272, 813, 787 cm<sup>-1</sup>; <sup>1</sup>H NMR (500 MHz, (CD<sub>3</sub>)<sub>2</sub>SO) δ 8.09 (d, *J* = 9.0 Hz, 1H), 7.61 (d, *J* = 3.0 Hz, 1H), 7.57 (d, *J* = 8.1 Hz, 2H), 7.47 (dd, *J* = 9.0, 3.0 Hz, 1H), 7.30 (d, *J* = 8.4 Hz, 2H), 3.86 (s, 3H), 2.37 (s, 3H); <sup>13</sup>C NMR (125 MHz, (CD<sub>3</sub>)<sub>2</sub>SO) δ 166.3, 162.6, 141.3, 134.2, 132.9, 130.0, 128.7, 122.3, 117.9, 115.8, 105.0, 104.9, 56.4, 51.2, 21.6; HRMS-ESI (m/z) [M+H]<sup>+</sup> calc'd for C<sub>17</sub>H<sub>14</sub>O<sub>3</sub>I, 392.9982, found 392.9988.

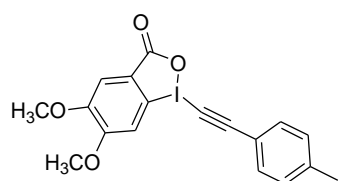

**5,6-Dimethoxy-1-(*p*-tolylethynyl)-1λ<sup>3</sup>-benzo[*d*][1,2]iodaoxol-3(1*H*)-one (3f)** (CAS: 2074732-35-5). Following the general procedure, the reaction from 5,6-dimethoxy-hydroxybenziodoxole (1.6 g, 5.0 mmol, 1.0 equiv) and trimethyl(*p*-tolylethynyl)silane (1.2 g, 5.5 mmol, 1.1 equiv) afforded alkynylbenziodoxole **3f** as a white solid (1.4 g, 65% yield): <sup>1</sup>H NMR (500 MHz, CDCl<sub>3</sub>) δ 7.82 (s, 1H), 7.64 (s, 1H), 7.48-7.43 (m, 2H), 7.22 (d, *J* = 7.6 Hz, 2H), 3.98 (s, 3H), 3.92 (s, 3H), 2.40 (s, 3H); <sup>13</sup>C NMR (125 MHz, (CD<sub>3</sub>)<sub>2</sub>SO) δ 166.8, 154.5,

151.7, 141.2, 132.7, 130.1, 125.4, 117.9, 113.0, 109.3, 106.2, 104.9, 56.5, 56.2, 52.5, 21.6.

**General synthesis of alkyl trifluoroborates** [1]. To the solution of alkyl boronic acid or pinacol ester (10 mmol) in methanol (20 mL) was added saturated aqueous  $\text{KHF}_2$  (15 mL, 3.91 g, 50 mmol, 5.0 equiv). The resulting suspension was stirred for 2 h and then concentrated to dryness. The residue, a white solid, was extracted with hot acetone, and the combined filtered extracts were concentrated to approximately 5 mL. Ether (or  $\text{CH}_2\text{Cl}_2$ ) was added and the resultant precipitate was collected and dried to afford the potassium trifluoroborate as a white solid.

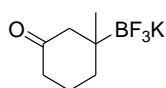

**Potassium (1-methyl-3-oxocyclohexyl)trifluoroborates (4a)** (CAS: 1260112-11-5). Following the literature procedure [1], bis(pinacolato)diboron (5.6 g, 22 mmol, 2.2 equiv), 3-methylcyclohex-2-enone (2.2 g, 10.0 mmol, 1.0 equiv), and 4-picoline (0.10 g, 1.0 mmol, 0.10 equiv) were added to a 100 mL round-bottomed flask with a magnetic stir bar. A solution of  $\text{CuSO}_4 \cdot 5\text{H}_2\text{O}$  (50 mg, 0.2 mmol) in distilled water (15 mL) was added to the reaction vessel. The reaction mixture was stirred vigorously for 3 h at room temperature until completion indicated by TLC. EtOAc (50 mL) was then added and allowed to stir for 15 minutes. The aqueous layer was extracted with EtOAc ( $2 \times 30$  mL) and the combined organic extracts were washed with brine (50 mL), dried over sodium sulfate, filtered, concentrated and purified by column chromatography to afford the alkyl boronic acid. The alkyl boronic acids afforded trifluoroborate **4a** via the general procedure as a white solid (3.3 g, 76% yield):  $^1\text{H}$  NMR (500 MHz,  $(\text{CD}_3)_2\text{SO}$ )  $\delta$  2.18 (dd,  $J = 13.3, 1.4$  Hz, 1H), 2.14-2.06 (m, 1H), 2.00-1.93 (m, 1H), 1.84 (tdd,  $J = 9.1, 5.7, 2.4$  Hz, 1H), 1.75-1.61 (m, 2H), 1.60-1.52 (m, 1H), 1.13 (dd,  $J = 13.4, 6.1$  Hz, 1H), 0.60 (d,  $J = 2.1$  Hz, 3H);

$^{13}\text{C}$  NMR (125 MHz,  $(\text{CD}_3)_2\text{SO}$ )  $\delta$  215.1, 51.3, 41.8, 33.6, 24.0, 22.9;  $^{19}\text{F}$  NMR (375 MHz,  $(\text{CD}_3)_2\text{SO}$ )  $\delta$  -144.9(d,  $J = 78.6$  Hz).

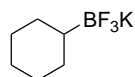

**Potassium cyclohexyltrifluoroborate (4b)** (CAS: 446065-11-8). Following the general procedure, the reaction from cyclohexylboronic acid (1.3 g, 10.0 mmol, 1.0 equiv) afforded potassium cyclohexyltrifluoroborate as a white solid (1.6 g, 79% yield):  $^1\text{H}$  NMR (500 MHz,  $(\text{CD}_3)_2\text{SO}$ )  $\delta$  1.61-1.52 (m, 3H), 1.52-1.44 (m, 2H), 1.14-0.98 (m, 3H), 0.94-0.82 (m, 2H), -0.02 (d,  $J = 23.2$  Hz, 1H);  $^{13}\text{C}$  NMR (125 MHz,  $(\text{CD}_3)_2\text{SO}$ )  $\delta$  29.3, 28.7, 27.9;  $^{19}\text{F}$  NMR (375 MHz,  $(\text{CD}_3)_2\text{SO}$ )  $\delta$  -144.4 (d,  $J = 96.1$  Hz).

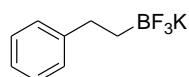

**Trifluoro(phenethyl)- $\lambda^4$ -borane, potassium salt 4c** (CAS: 329976-74-1). Following the literature procedure [1], styrene (1.0 g, 10.0 mmol, 1.0 equiv) in THF (2.0 mL) was added dropwise to a solution of  $\text{BH}_3 \cdot \text{THF}$  (20.0 mL, 20.0 mmol, 1.0 M solution in THF, 2.0 equiv) at 0 °C. The mixture was stirred for 2 h at room temperature and  $\text{H}_2\text{O}$  (2.0 mL) was slowly added. After stirring for additional 3 h at room temperature, the reaction mixture was concentrated in vacuo, diluted with ethyl acetate (30 mL), and washed with saturated aqueous bicarbonate (20 mL) and brine (20 mL). The organic layer was dried over sodium sulfate, filtered, and concentrated to approximately 5 mL. Petroleum ether was then added. The resultant precipitate was washed with petroleum ether and dried under vacuum to afford the alkylboronic acid as a white solid. The alkyl boronic acids afford trifluoroborate **4c** via the general procedure as a white solid (86.3 mg, 41% yield):  $^1\text{H}$  NMR (500 MHz,  $(\text{CD}_3)_2\text{SO}$ )  $\delta$  7.19 (t,  $J = 7.6$  Hz, 2H), 7.14-7.10 (m, 2H), 7.08-7.01 (m, 1H), 2.46-2.39 (m, 2H), 0.29 (dp,  $J = 16.8, 6.2$  Hz, 2H);  $^{13}\text{C}$  NMR (125 MHz,  $(\text{CD}_3)_2\text{SO}$ )  $\delta$  148.5, 128.3, 128.1, 124.8, 32.6 (q,  $J = 2.5$  Hz);  $^{19}\text{F}$  NMR (375 MHz,  $\text{CDCl}_3$ )  $\delta$  -137.3.

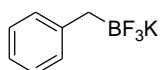

**Benzyltrifluoro- $\lambda^4$ -borane, potassium salt 4d** (CAS: 329976-73-0). Following the literature procedure [1], CuI (19 mg, 1.0 mmol, 0.10 equiv), PPh<sub>3</sub> (367 mg, 1.4 mmol, 0.14 equiv), LiOMe (760 mg, 20.0 mmol, 2.0 equiv), and bis(pinacolato)diboron (3.80 g, 15 mmol, 1.5 equiv) were added to a 250 mL round-bottomed flask equipped with a stir bar. The vessel was evacuated and filled with nitrogen gas three times. DMF (40 mL) and the benzyl bromide (1.7 g, 10.0 mmol, 1.0 equiv) were added by syringe under a nitrogen atmosphere. The resulting reaction mixture was stirred vigorously at 25 °C for 18 h. The reaction mixture was then diluted with EtOAc and filtered through silica gel with copious EtOAc. The filtrate was concentrated and purified by column chromatography to afford the pinacol ester. The pinacol ester afforded trifluoroborate **4d** via the general procedure as a white solid (983 mg, 50% yield): <sup>1</sup>H NMR (500 MHz, (CD<sub>3</sub>)<sub>2</sub>SO)  $\delta$  7.03 (dd,  $J$  = 8.0, 7.1 Hz, 2H), 7.00-6.95 (m, 2H), 6.86 (tt,  $J$  = 7.0, 1.5 Hz, 1H), 1.46 (q,  $J$  = 6.3 Hz, 2H); <sup>13</sup>C NMR (125 MHz, (CD<sub>3</sub>)<sub>2</sub>SO)  $\delta$  147.3, 129.0, 127.3, 122.4; <sup>19</sup>F NMR (375 MHz, (CD<sub>3</sub>)<sub>2</sub>CO)  $\delta$  140.7 (dd,  $J$  = 112.7, 50.6 Hz).

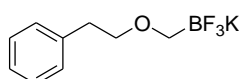

**Trifluoro(phenethoxymethyl)- $\lambda^4$ -borane, potassium salt 4e**. Following the literature procedure [2], NaH (360 mg, 15 mmol, 3.0 equiv) was added to a 50 mL 2-neck round-bottom-flask and purged with N<sub>2</sub> three times. The content was diluted with dry THF (40 mL) and phenylethyl alcohol (1.8 g, 15.0 mmol, 3.0 equiv) was then added dropwise to the reaction mixture at 0 °C under N<sub>2</sub>. After stirring for 15 min at 0 °C, the temperature was increased to rt and further stirred for 30 min. Bromomethyltrifluoroborate (1.0 g, 5 mmol, 1.0 equiv) was added in one portion to the suspension at 0 °C, and the reaction was stirred at rt for 3 h. The reaction was quenched by adding saturated solution of KHF<sub>2</sub> (20 mL). The final mixture was stirred for 30 min and then concentrated and dried overnight under high vacuum to

remove the trace solvent. The crude residue was suspended in anhydrous acetone (3 × 50 mL) and filtered. The filtrate was concentrated to a minimal volume (5–10 mL) and Et<sub>2</sub>O (≈150 mL) was added to precipitate. The white precipitate was isolated by filtration, washing with hexanes (≈30 mL) and CH<sub>2</sub>Cl<sub>2</sub> (≈30 mL), to afford trifluoroborate **4e** as a white solid (875 mg, 72% yield): IR (neat) 2950, 2882, 2862, 1454, 1244, 1084, 1006, 958, 806, 699 cm<sup>-1</sup>; <sup>1</sup>H NMR (500 MHz, (CD<sub>3</sub>)<sub>2</sub>SO) δ 7.27-7.23 (m, 2H), 7.22-7.18 (m, 2H), 7.18-7.14 (m, 1H), 3.38 (t, *J* = 7.5 Hz, 2H), 2.74 (t, *J* = 7.4 Hz, 2H), 2.53 (q, *J* = 5.5 Hz, 2H); <sup>13</sup>C NMR (125 MHz, (CD<sub>3</sub>)<sub>2</sub>SO) δ 140.1, 129.2, 128.6, 126.2, 74.9, 36.4; <sup>19</sup>F NMR (375 MHz, CDCl<sub>3</sub>) δ -140.7. HRMS-ESI (m/z) [M]<sup>-</sup> calc'd for C<sub>9</sub>H<sub>11</sub>O<sub>10</sub>BF<sub>3</sub>, 202.0897, found 202.0898.

**General synthesis of tertiary alcohols** [3]. A flame-dried round bottom flask charged with 40 mmol (4.0 equiv) of 4-bromoanisole in 40 mL THF was cooled to -78 °C and 16 mL BuLi (2.5 M in hexane, 40 mmol, 4.0 equiv) was added dropwise via syringe. The mixture was stirred for 1.5 h at -78 °C before the addition of the corresponding methyl ester (10 mmol, 1.0 equiv), then the mixture was warmed to room temperature and stirred overnight. After ammonium chloride solution quenching, the precipitated solid was removed by filtration. The filtrate was extracted with ethyl acetate (3 × 30 mL), washed with sodium chloride solution, and dried over Na<sub>2</sub>SO<sub>4</sub>. After filtration and concentration, the residue was purified by column chromatography to afford the tertiary alcohol as a white solid.

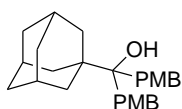

**2-((3*r*,5*r*,7*r*)-Adamantan-1-yl)-1,3-bis(4-methoxyphenyl)propan-2-ol (6a)** (CAS: 210624-71-8), Following the general synthesis of tertiary alcohols [3], the reaction adamantane-1-carboxylic acid methyl ester (1.9 g, 10 mmol, 1.0 equiv) afforded tertiary alcohol **6a** as a white solid (1.1 g, 27% yield): TLC R<sub>f</sub> = 0.29 (EA/PE = 1:10); <sup>1</sup>H NMR (500 MHz, CDCl<sub>3</sub>) δ 7.47(d, *J* = 9.0 Hz, 4H), 6.80 (d, *J* = 9.0 Hz, 4H), 3.79

(s, 6H), 2.16 (s, 1H), 1.99 (s, 3H), 1.84 (d,  $J = 2.5$  Hz, 6H), 1.63 (q,  $J = 11.9$  Hz, 6H);  $^{13}\text{C}$  NMR (125MHz,  $\text{CDCl}_3$ )  $\delta$  157.8, 137.8, 129.7, 112.4, 81.8, 55.1, 41.2, 37.4, 37.0, 28.8.

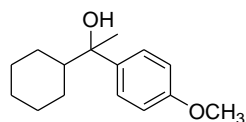

**1-Cyclohexyl-1-(4-methoxyphenyl)ethan-1-ol (6b)** (CAS: 97704-00-2). Following the general synthesis of tertiary alcohols, the reaction from 4-bromoanisole (2.8 g, 15mmol, 1.5 equiv), *n*-BuLi (2.5 M in hexane, 15 mmol, 1.5 equiv) and 1-cyclohexylethan-1-one (1.26 g, 10 mmol, 1.0 equiv) afforded tertiary alcohol **6b** as a colorless oil (1.96 g, 80% yield): TLC  $R_f = 0.59$  (EA/PE = 1:6);  $^1\text{H}$  NMR (500 MHz,  $\text{CDCl}_3$ )  $\delta$  7.32 (d,  $J = 8.9$  Hz, 2H), 6.87 (d,  $J = 8.9$  Hz, 2H), 3.81 (s, 3H), 1.73 (m, 3H), 1.66 – 1.61 (m, 2H), 1.59 – 1.54 (m, 1H), 1.52 (s, 3H), 1.18 (dddq,  $J = 15.9, 9.8, 6.4, 3.2$  Hz, 2H), 1.08 (tt,  $J = 13.0, 3.3$  Hz, 1H), 0.96 (dtt,  $J = 16.4, 8.6, 3.7$  Hz, 2H);  $^{13}\text{C}$  NMR (125MHz,  $\text{CDCl}_3$ )  $\delta$  158.1, 140.0, 126.5, 113.1, 76.4, 55.2, 49.2, 27.4, 27.3, 26.7 (d,  $J = 3.1$  Hz). 26.4.

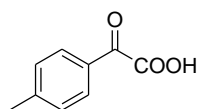

**Synthesis of ketoacid 2-oxo-2-(*p*-tolyl)acetic acid (8)** (CAS: 7163-50-0). Following the slightly modified literature procedure [5], in a round-bottomed flask mounted with a cooling system under  $\text{N}_2$ ,  $\text{AlCl}_3$  (2.6 g, 20 mmol, 2.0 equiv) was suspended in  $\text{CH}_2\text{Cl}_2$  (15 mL) at 0 °C. To this mixture mono-ethyloxalyl chloride (2.7 g, 20 mmol, 2.0 equiv) was added dropwise in about 15 min. After 10 min the stirred suspension became a pale yellow solution. At 0 °C, toluene (0.92 g, 40 mmol, 4.0 equiv) was added dropwise in about 10 min. The solution was then stirred at rt for 1 h before was poured over crushed ice and 50 mL of concentrated hydrochloric acid. Extraction was performed with  $\text{CH}_2\text{Cl}_2$ , the organic layer was collected and washed



with 0.1 N sodium hydroxide (40 mL) and brine. After the organic layer was separated and dried over Na<sub>2</sub>SO<sub>4</sub>, the solvent was evaporated and the crude product directly subjected to hydrolysis to afford **8** as a white needle crystal: <sup>1</sup>H NMR (500 MHz, CDCl<sub>3</sub>) δ 8.55 (s, 1H), 8.26-8.19 (m, 2H), 7.33 (d, *J* = 8.0 Hz, 2H), 2.45 (s, 3H); <sup>13</sup>C NMR (125 MHz, CDCl<sub>3</sub>) δ 183.9, 162.3, 147.3, 131.4, 129.7, 129.2, 22.0.

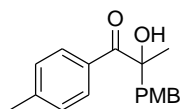

**2-Hydroxy-2-(4-methoxyphenyl)-1-(*p*-tolyl)propan-1-one** (**10**) (CAS: 2074732-28-6). Following the literature procedure [6], a flame-dried round bottom flask charged with *p*-bromotoluene (2.6 g, 15 mmol, 1.5 equiv) in 20 mL THF was cooled to -78 °C and 6 mL *n*-BuLi (2.5 M in hexane, 15 mmol, 1.5 equiv) was added dropwise via syringe under a nitrogen atmosphere. The mixture was stirred for 1.5 h at -78 °C before the addition of 2-(4-methoxyphenyl)-2-((trimethylsilyl)oxy)propanenitrile (2.5 g, 10 mmol, 1.0 equiv), then the mixture was warmed to room temperature and stirred over 3 h. After ammonium chloride solution quenching, the precipitated solid was removed by filtration. The filtrate was extracted with ethyl acetate, washed with sodium chloride solution, and dried over Na<sub>2</sub>SO<sub>4</sub>. After filtration and concentration, the crude product and 40 mL THF was added to a 100 mL round-bottomed flask equipped with a stir bar. 10 mL 10% HCl was added via syringe at 0 °C and stirred for 5 h at the same temperature. After 30 mL H<sub>2</sub>O quenching, the solution was extracted with ethyl acetate, washed with sodium chloride solution, and dried over Na<sub>2</sub>SO<sub>4</sub>. After filtration and concentration, the residue was purified by column chromatography to afford **10** as a pale yellow oil: TLC R<sub>f</sub> = 0.38 (EA/PE = 1:5); <sup>1</sup>H NMR (500 MHz, CDCl<sub>3</sub>) δ 7.61 (d, *J* = 8.3 Hz, 2H), 7.36 (d, *J* = 8.9 Hz, 2H), 7.11 (d, *J* = 9.1 Hz, 2H), 6.91 (d, *J* = 8.9 Hz, 2H), 4.89 (s, 1H), 3.81 (s, 3H), 2.34 (s, 3H), 1.89 (s, 3H); <sup>13</sup>C NMR (125 MHz, CDCl<sub>3</sub>) δ 201.7, 159.3, 143.9, 134.8, 130.6, 130.4, 129.0, 127.3, 114.3, 78.3, 55.3, 26.0, 21.6.

#### IV. Radical alkylation product characterization

**Standard procedure for alkyl trifluoroborates.** Following the literature procedure [1], alkyl potassium trifluoroborate (0.15 mmol, 1.5 equiv), alkynylbenziodoxole (0.10 mmol, 1.0 equiv), Ru(bpy)<sub>3</sub>(PF<sub>6</sub>)<sub>2</sub> (1.7 mg, 0.002 mmol, 0.02 equiv), hydroxybenziodoxole (BI-OH, 13.2 mg, 0.05 mmol, 0.5 equiv), and Na<sub>2</sub>CO<sub>3</sub> (21.2 mg, 0.2 mmol, 2.0 equiv) were placed in a 5 mL clear-colored glass vial equipped with a magnetic stir bar. After 1.0 mL CH<sub>2</sub>Cl<sub>2</sub> and 1.0 mL H<sub>2</sub>O (water was bubbled with nitrogen gas for 30 minutes to remove oxygen before the experiment) were added, the vial was sealed and exposed to blue LEDs at room temperature for 20 h with stirring until TLC indicated the complete consumption of alkynylbenziodoxoles. The reaction mixture was extracted with CH<sub>2</sub>Cl<sub>2</sub> and the organic layer was concentrated and purified directly by column chromatography to afford the product.

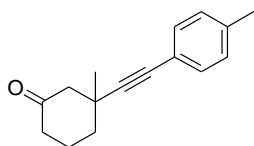

**3-Methyl-3-(*p*-tolylethynyl)cyclohexan-1-one (5a).** Following the standard procedure for alkyl trifluoroborates, the reaction of trifluoroborate **4a** (65.4 mg, 0.3 mmol, 3.0 equiv), alkynylbenziodoxole **3a** (39.8 mg, 0.1 mmol, 1.0 equiv), and Na<sub>2</sub>CO<sub>3</sub> (42.4 mg, 0.4 mmol, 4.0 equiv) for 20 h afforded alkyne **5a** as a colorless oil (10.6 mg, 47% yield) after flash chromatography. When alkynylbenziodoxole **3b** (38.0 mg, 0.10 mmol, 1.0 equiv) was used, 8.8 mg, 39% yield of alkyne **5a** was obtained. When alkynylbenziodoxole **3c** (36.2 mg, 0.10 mmol, 1.0 equiv) was used, 11.3 mg, 50% yield of alkyne **5a** was obtained. When alkynylbenziodoxole **3d** (39.2 mg, 0.10 mmol, 1.0 equiv) was used, 11.6 mg, 52% yield of alkyne **5a** was obtained. When alkynylbenziodoxole **3e** (39.2 mg, 0.10 mmol) was used, 10.4 mg, 47% yield of alkyne **5a** was obtained when alkynylbenziodoxole **3f** (42.2 mg, 0.10 mmol) was used, 16.8 mg, 74% yield of alkyne **5a** was obtained: TLC R<sub>f</sub> = 0.45 (EtOAc / PE = 1/10); IR (neat) 2963, 2928, 2870, 1715, 1510, 1455, 1310, 1228, 817 cm<sup>-1</sup>; <sup>1</sup>H NMR

(500 MHz, CDCl<sub>3</sub>)  $\delta$  7.26-7.23 (m, 2H), 7.09-7.05 (m, 2H), 2.59 (dt,  $J = 13.7, 2.0$  Hz, 1H), 2.45-2.37 (m, 1H), 2.34-2.30 (m, 4H), 2.28-2.11 (m, 2H), 2.06-1.95 (m, 2H), 1.74-1.67 (m, 1H), 1.41 (s, 3H); <sup>13</sup>C NMR (125 MHz, CDCl<sub>3</sub>)  $\delta$  209.3, 137.9, 131.5, 128.9, 120.1, 92.4, 83.6, 54.2, 40.6, 37.9, 36.7, 29.3, 22.9, 21.4; HRMS-ESI (m/z) [M+H]<sup>+</sup> calc'd for C<sub>16</sub>H<sub>18</sub>O, 227.1430, found 227.1428.

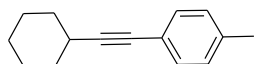

**1-(Cyclohexylethynyl)-4-methylbenzene (5b)** (CAS: 1529771-44-5). Following the standard procedure for alkyl trifluoroborates, the reaction of trifluoroborate **4b** (28.5 mg, 0.15 mmol, 1.5 equiv) and alkynylbenziodoxole **3a** (39.8 mg, 0.10 mmol, 1.0 equiv) for 20 h afforded alkyne **5b** as a colorless oil (15.8 mg, 80% yield) after flash chromatography. When alkynylbenziodoxole **3b** (38.0 mg, 0.10 mmol, 1.0 equiv) was used, 16.4 mg, 83% yield of alkyne **5b** was obtained. When alkynylbenziodoxole **3c** (36.2 mg, 0.10 mmol, 1.0 equiv) was used, 16.4 mg, 83% yield of alkyne **5b** was obtained. When alkynylbenziodoxole **3d** (39.2 mg, 0.10 mmol, 1.0 equiv) was used, 14.7 mg, 74% yield of alkyne **5b** was obtained. When alkynylbenziodoxole **3e** (39.2 mg, 0.10 mmol, 1.0 equiv) was used, 16.6 mg, 84% yield of alkyne **5b** was obtained. When alkynylbenziodoxole **3f** (42.2 mg, 0.10 mmol, 1.0 equiv) was used, 17.0 mg, 86% yield of alkyne **5b** was obtained. TLC R<sub>f</sub> = 0.6(PE); <sup>1</sup>H NMR (500 MHz, CDCl<sub>3</sub>)  $\delta$  7.29 (d,  $J = 8.1$  Hz, 2H), 7.08 (d,  $J = 7.8$  Hz, 2H), 2.57 (tt,  $J = 8.9, 3.6$  Hz, 1H), 2.33 (s, 3H), 1.92-1.84 (m, 2H), 1.75 (tt,  $J = 8.3, 4.1$  Hz, 2H), 1.58-1.48 (m, 3H), 1.40-1.30 (m, 3H); <sup>13</sup>C NMR (125 MHz, CDCl<sub>3</sub>)  $\delta$  137.3, 131.4, 128.9, 121.0, 93.6, 80.5, 32.8, 29.7, 25.9, 24.9, 21.4.

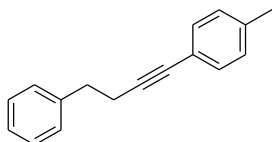

**1-Methyl-4-(4-phenylbut-1-yn-1-yl)benzene (5c)** (CAS: 1064664-64-7). Following the standard procedure for alkyl trifluoroborates, the reaction of

trifluoroborate **4c** (31.8 mg, 0.15 mmol, 1.5 equiv) and alkynylbenziodoxole **3a** (39.8 mg, 0.10 mmol, 1.0 equiv) for 20 h afforded alkyne **5c** as a colorless oil (14.4 mg, 65% yield) after flash chromatography. When alkynylbenziodoxole **3c** (36.2 mg, 0.10 mmol, 1.0 equiv) was used, 14.9 mg, 68% yield of alkyne **5c** was obtained. When alkynylbenziodoxole **3f** (42.2 mg, 0.10 mmol, 1.0 equiv) was used, 16.1 mg, 73% yield of alkyne **5c** was obtained: TLC  $R_f = 0.4$  (PE);  $^1\text{H}$  NMR (500 MHz,  $\text{CDCl}_3$ )  $\delta$  7.35-7.31 (m, 2H), 7.30-7.26 (m, 4H), 7.26-7.22 (m, 1H), 7.12-7.08 (m, 2H), 2.94 (t,  $J = 7.6$  Hz, 2H), 2.70 (t,  $J = 7.6$  Hz, 2H), 2.34 (s, 3H);  $^{13}\text{C}$  NMR (125 MHz,  $\text{CDCl}_3$ )  $\delta$  140.8, 137.6, 131.4, 128.9, 128.5, 128.4, 126.3, 120.8, 88.7, 81.3, 35.3, 21.7, 21.4.

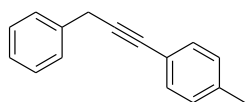

**1-Methyl-4-(3-phenylprop-1-yn-1-yl)benzene (5d)** (CAS: 852031-46-0).

Following the standard procedure for alkyl trifluoroborates, the reaction of trifluoroborate **4d** (29.7 mg, 0.15 mmol, 1.5 equiv) and alkynylbenziodoxole **3a** (39.8 mg, 0.10 mmol, 1.0 equiv) for 20 h afforded alkyne **5d** as a colorless oil (12.8 mg, 62% yield) after flash chromatography. When alkynylbenziodoxole **3c** (36.2 mg, 0.10 mmol, 1.0 equiv) was used, 12.4 mg, 60% yield of alkyne **5d** was obtained. When alkynylbenziodoxole **3f** (42.2 mg, 0.10 mmol, 1.0 equiv) was used, 14.4 mg, 70% yield of alkyne **5d** was obtained. TLC  $R_f = 0.54$  (PE);  $^1\text{H}$  NMR (400 MHz,  $\text{CDCl}_3$ )  $\delta$  7.45 (d,  $J = 7.5$  Hz, 2H), 7.40-7.34 (m, 4H), 7.29 (d,  $J = 6.7$  Hz, 1H), 7.14 (d,  $J = 7.9$  Hz, 2H), 3.86 (s, 2H), 2.37 (s, 3H);  $^{13}\text{C}$  NMR (125 MHz,  $\text{CDCl}_3$ )  $\delta$  137.8, 136.9, 131.5, 129.0, 128.5, 127.9, 126.6, 120.6, 86.7, 82.7, 25.8, 21.4.

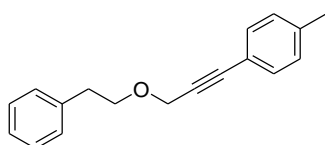

**1-Methyl-4-(3-phenethoxyprop-1-yn-1-yl)benzene (5e)**. Following the standard procedure for alkyl trifluoroborates, the reaction of trifluoroborate **4e** (36.3 mg, 0.15

mmol, 1.5 equiv) and alkynylbenziodoxole **3a** (39.8 mg, 0.10 mmol, 1.0 equiv) for 20 h afforded alkyne **5c** as a colorless oil (20.2 mg, 81% yield) after flash chromatography. When alkynylbenziodoxole **3c** (36.2 mg, 0.10 mmol, 1.0 equiv) was used, 18.8 mg, 75% yield of alkyne **5e** was obtained. When alkynylbenziodoxole **3f** (42.2 mg, 0.10 mmol, 1.0 equiv) was used, 20.5 mg, 82% yield of alkyne **5e** was obtained: TLC  $R_f = 0.41$  (EtOAc/PE = 1/20); IR (neat) 3027, 2962, 2854, 1604, 1509, 1261, 1095, 1022, 816, 800  $\text{cm}^{-1}$ ;  $^1\text{H}$  NMR (500 MHz,  $\text{CDCl}_3$ )  $\delta$  7.36-7.33 (m, 2H), 7.33-7.28 (m, 2H), 7.28-7.25 (m, 2H), 7.25-7.20 (m, 1H), 7.12 (dt,  $J = 7.7, 0.8$  Hz, 2H), 4.39 (s, 2H), 3.83 (t,  $J = 7.2$  Hz, 2H), 2.97 (t,  $J = 7.2$  Hz, 2H), 2.35 (s, 3H);  $^{13}\text{C}$  NMR (125 MHz,  $\text{CDCl}_3$ )  $\delta$  138.7, 138.5, 131.7, 129.0, 128.9, 128.4, 126.3, 119.6, 86.3, 84.4, 70.9, 59.0, 36.1, 21.5; HRMS-ESI ( $m/z$ )  $[\text{M}+\text{NH}_4]^+$  calc'd for  $\text{C}_{18}\text{H}_{22}\text{ON}$ , 268.1696, found 268.1695.

**Standard procedure for tertiary alcohols.** Following the literature procedure [3], tertiary alcohol (0.25 mmol, 2.5 equiv), alkynylbenziodoxole (0.10 mmol, 1.0 equiv),  $\text{Ru}(\text{bpy})_3(\text{PF}_6)_2$  (1.7 mg, 0.002 mmol, 0.02 equiv), and BI-OAc (76.5 mg, 0.25 mmol, 2.5 equiv) were placed in a 5 mL clear-colored glass vial equipped with a magnetic stir bar. After 2.0 mL DCE (anhydrous) were added, the vial was sealed and exposed to blue LEDs at room temperature for 24 h with stirring. After TLC indicated the complete consumption of alkynylbenziodoxoles, the reaction mixture was concentrated and purified directly by column chromatography to afford the product.

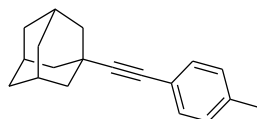

**(3r,5r,7r)-1-(p-Tolyethynyl)adamantine (7a)** (CAS: 851073-59-1). Following the standard procedure for tertiary alcohols, the reaction of **6a** (94.6 mg, 0.25 mmol, 2.5 equiv) and alkynylbenziodoxole **3a** (40.2 mg, 0.10 mmol, 1.0 equiv) for 24 h afforded **7a** as a white solid (17.0 mg, 67% yield) after flash chromatography. When

alkynylbenziodoxole **3c** (36.2 mg, 0.10 mmol, 1.0 equiv) was used, 18.4 mg, 74% yield of alkyne **7a** was obtained. When alkynylbenziodoxole **3f** (42.2 mg, 0.10 mmol, 1.0 equiv) was used, 21.2 mg, 85% yield of alkyne **7a** was obtained. TLC  $R_f = 0.69$  (PE);  $^1\text{H}$  NMR (500 MHz,  $\text{CDCl}_3$ )  $\delta$  7.28 (d,  $J = 8.1$  Hz, 2H), 7.07 (d,  $J = 7.9$  Hz, 2H), 2.33 (s, 3H), 2.03-1.94 (m, 9H), 1.73 (t,  $J = 2.9$  Hz, 6H);  $^{13}\text{C}$  NMR (125 MHz,  $\text{CDCl}_3$ )  $\delta$  137.2, 131.5, 128.8, 121.0, 97.6, 79.3, 42.9, 36.4, 30.0, 28.1, 21.4.

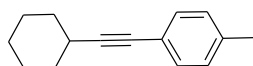

**1-(Cyclohexylethynyl)-4-methylbenzene (5b)** (CAS: 1529771-44-5). Following the standard procedure for tertiary alcohols, the reaction of **6b** (58.6 mg, 0.25 mmol, 2.5 equiv) and alkynylbenziodoxole **3a** (39.9 mg, 0.10 mmol, 1.0 equiv) for 24 h afforded **5b** as a colorless oil (14.8 mg, 75% yield) after flash chromatography; When alkynylbenziodoxole **3c** (36.5 mg, 0.10 mmol, 1.0 equiv) was used, 14.6 mg, 74% yield of alkyne **5b** was obtained. When alkynylbenziodoxole **3f** (42.4 mg, 0.10 mmol, 1.0 equiv) was used, 15.8 mg, 80% yield of alkyne **5b** was obtained.

**Standard procedure for ketoacids.** Following the literature procedure [5], alketoacid (0.15 mmol, 1.5 equiv), alkynylbenziodoxole (0.10 mmol, 1.0 equiv),  $\text{Ru}(\text{bpy})_3(\text{PF}_6)_2$  (1.7 mg, 0.002 mmol, 0.02 equiv), and 1-acetoxy-1,2-benziodoxol-3-(1H)-one (BIOAc, 30.6 mg, 0.10 mmol, 1.0 equiv) were placed in a 5 mL clear-colored glass vial equipped with a magnetic stir bar. After 2.0 mL  $\text{CH}_2\text{Cl}_2$  were added, the vial was sealed and exposed to blue LEDs at room temperature for 5 h with stirring until TLC indicated the complete consumption of alkynylbenziodoxoles. The reaction mixture was concentrated and purified directly by column chromatography to afford the product.

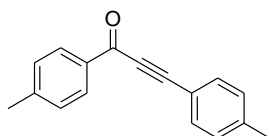

**1,3-Di-p-tolylprop-2-yn-1-one 9** (CAS: 97691-66-2). Following the standard procedure for ketoacids, the reaction of ketoacid **8** (24.6 mg, 0.15 mmol, 1.5 equiv) and alkynylbenziodoxole **3a** (40.6 mg, 0.10 mmol, 1.0 equiv) for 5 h afforded ynone **9** as a white solid (15.1 mg, 63% yield) after flash chromatography. When alkynylbenziodoxole **3c** (37.2 mg, 0.10 mmol, 1.0 equiv) was used, 18.5 mg, 77% yield of alkyne **9** was obtained. When alkynylbenziodoxole **3f** (43.3 mg, 0.10 mmol, 1.0 equiv) was used, 19.0 mg, 79% yield of alkyne **9** was obtained. TLC:  $R_f = 0.61$  (EtOAc / Hexanes = 1/20);  $^1\text{H NMR}$  (500 MHz,  $\text{CDCl}_3$ )  $\delta$  8.12 (d,  $J = 8.2$  Hz, 2H), 7.59 (d,  $J = 8.1$  Hz, 2H), 7.32 (d,  $J = 8.4$  Hz, 2H), 7.23 (d,  $J = 8.3$  Hz, 2H), 2.46 (s, 3H), 2.42 (s, 3H);  $^{13}\text{C NMR}$  (125 MHz,  $\text{CDCl}_3$ )  $\delta$  177.8, 145.1, 141.4, 134.7, 133.1, 129.7, 129.5, 129.3, 117.2, 93.3, 86.8, 21.8, 21.8.

**Standard procedure for  $\beta$ -ketone alcohols.** Following the literature procedure [6],  $\beta$ -ketone alcohol (0.20 mmol, 2.0 equiv), alkynylbenziodoxole (0.10 mmol, 1.0 equiv),  $\text{Ru}(\text{bpy})_3(\text{PF}_6)_2$  (1.7 mg, 0.002 mmol, 0.02 equiv), and BI-OAc (61.2 mg, 0.20 mmol, 2.0 equiv) were placed in a 5 mL clear-colored glass vial equipped with a magnetic stir bar. After 2.0 mL DCM were added, the vial was sealed and exposed to blue LEDs at room temperature with stirring. After TLC indicated the complete consumption of alkynylbenziodoxoles (24 h), the reaction mixture was extracted with  $\text{CH}_2\text{Cl}_2$  and the organic layer was concentrated and purified directly by column chromatography to afford the product.

**1,3-Di-p-tolylprop-2-yn-1-one 9** (CAS: 97691-66-2). Following the standard procedure for  $\beta$ -ketone alcohols, the reaction of  $\beta$ -ketone alcohol **10** (54.0 mg, 0.20 mmol, 2.0 equiv) and alkynylbenziodoxole **3a** (39.8 mg, 0.10 mmol, 1.0 equiv) for 24 h afforded ynone **9** as a white solid (14.5 mg, 62% yield) after flash chromatography. When alkynylbenziodoxole **3c** (36.2 mg, 0.10 mmol, 1.0 equiv) was used, 19.7 mg, 84% yield of alkyne **9** was obtained. When alkynylbenziodoxole **3f** (42.2 mg, 0.10 mmol, 1.0 equiv) was used, 19.7 mg, 84% yield of alkyne **9** was obtained.

## V. References

1. Huang, H. C.; Zhang, G. J.; Gong, L.; Zhang, S. Y.; Chen, Y. Y. *J. Am. Chem. Soc.* **2014**, *136*, 2280-2283.
2. Karakaya, I.; Primer, D. N.; Molander, G. A. *Org. Lett.* **2015**, *17*, 3294-3297.
3. Jia, K. F.; Zhang, F. Y.; Huang, H. C.; Chen, Y. Y. *J. Am. Chem. Soc.* **2016**, *138*, 1514-1517.
4. Hanson, R. N.; Tongcharoensirikul, P.; Barnsley, K.; Ondrechen, M. J.; Hughes, A.; DeSombre, E. R. *Steroids*, **2015**, *96*, 50-62.
5. Huang, H. C.; Zhang, G. J.; Chen, Y. Y. *Angew. Chem. Int. Ed.* **2015**, *54*, 7872-7876.
6. Jia, K. F.; Pan, Y.; Chen, Y. Y. *Angew. Chem. Int. Ed.* **2017**, *56*, 2478-2481



## VI. NMR Spectra of New Compounds

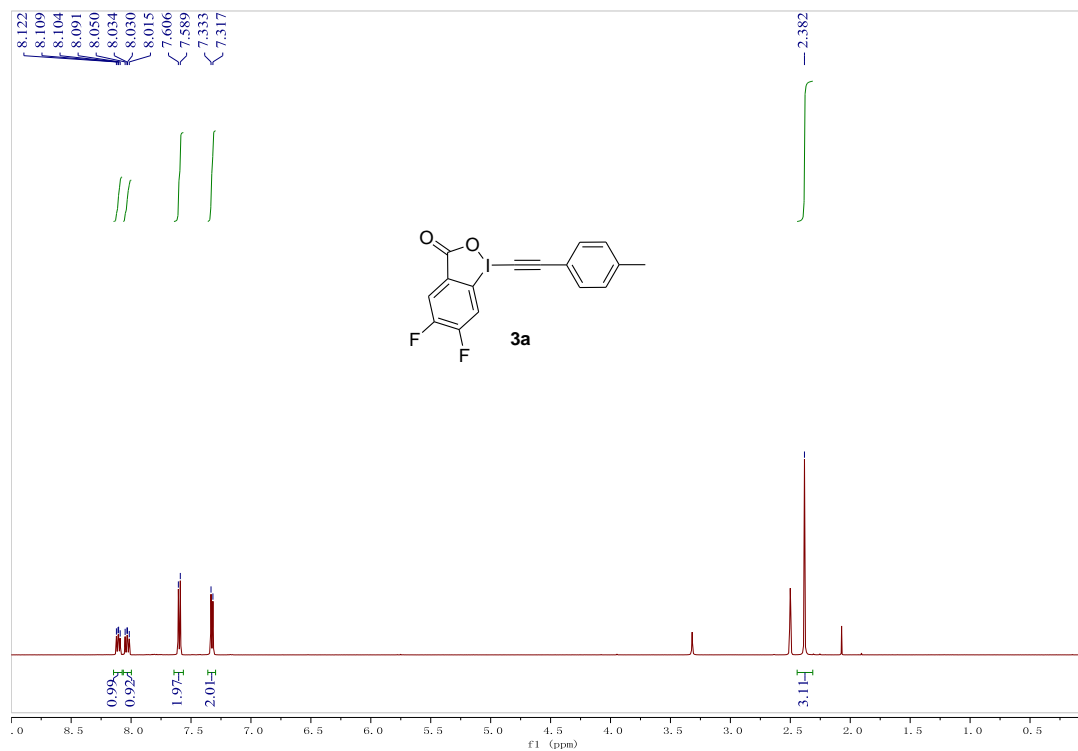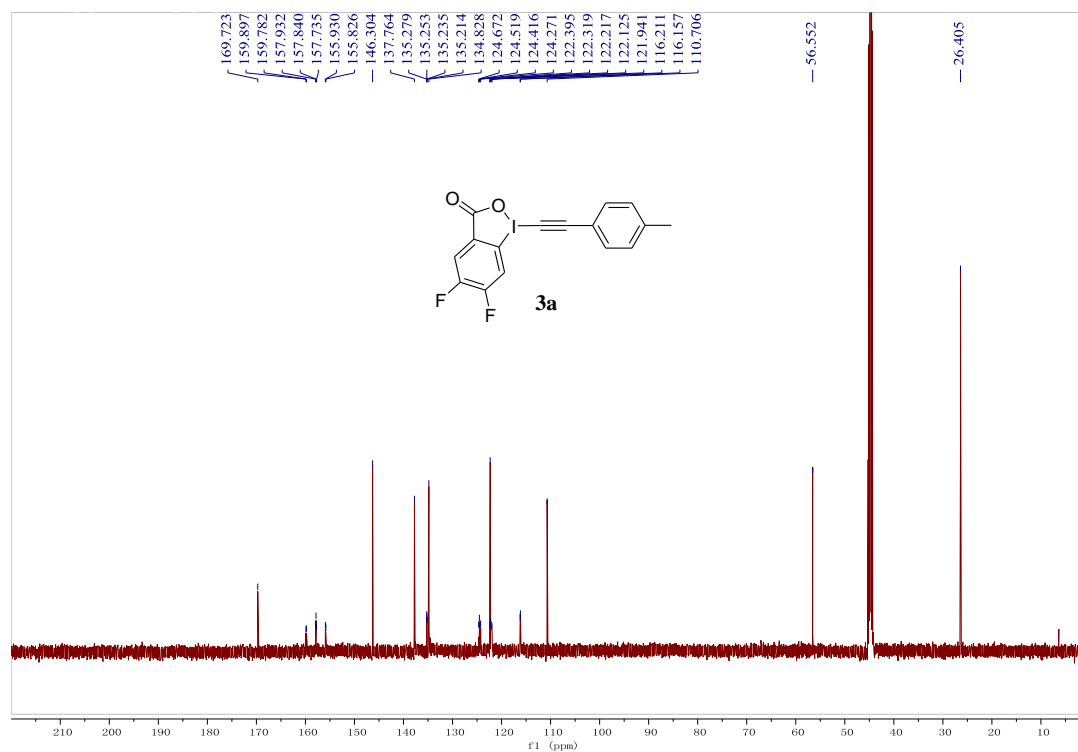

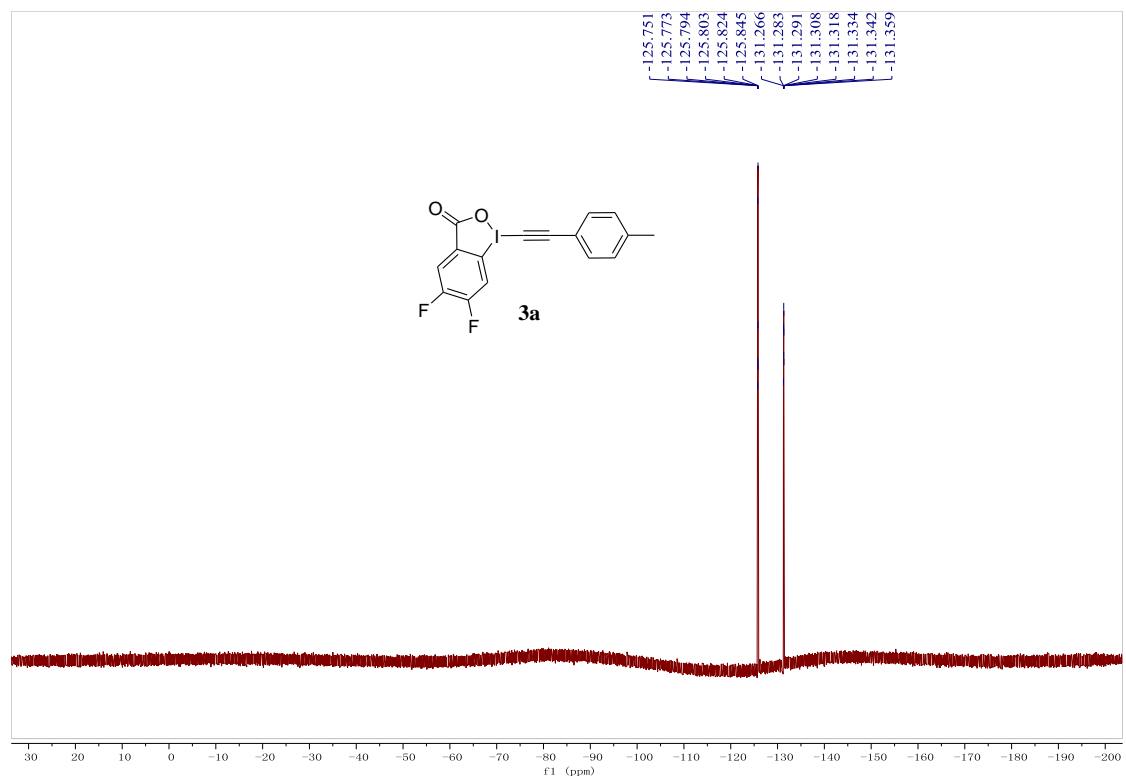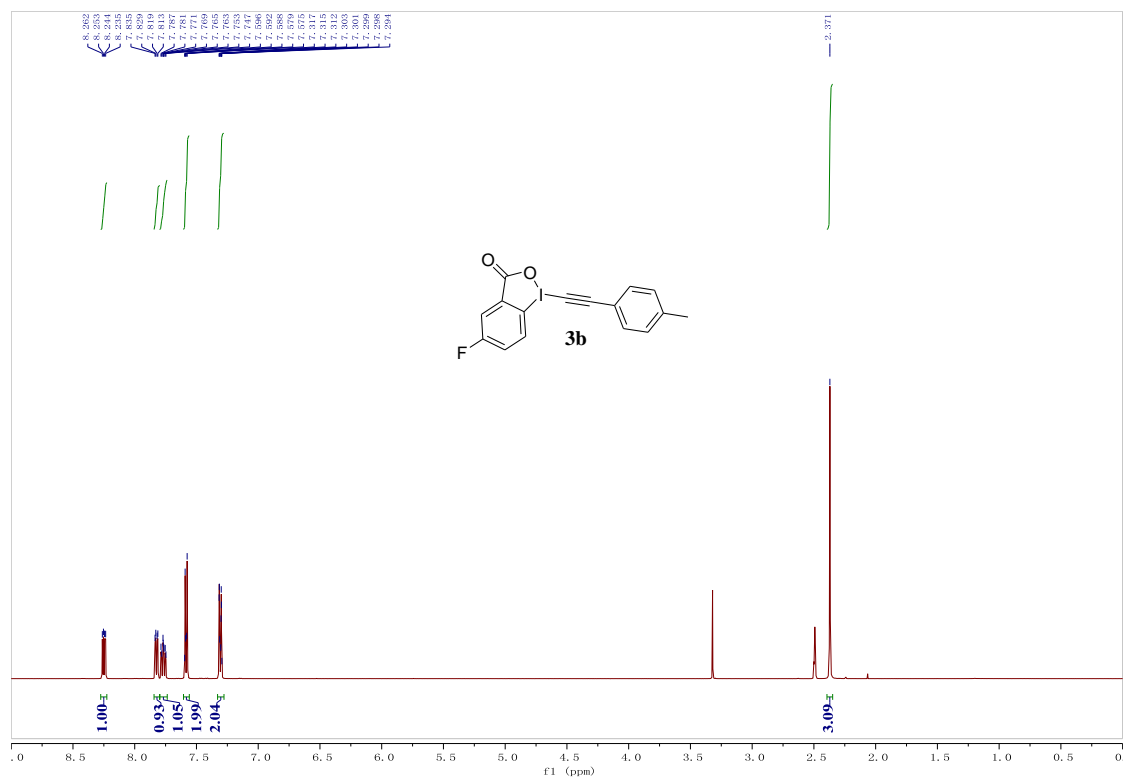

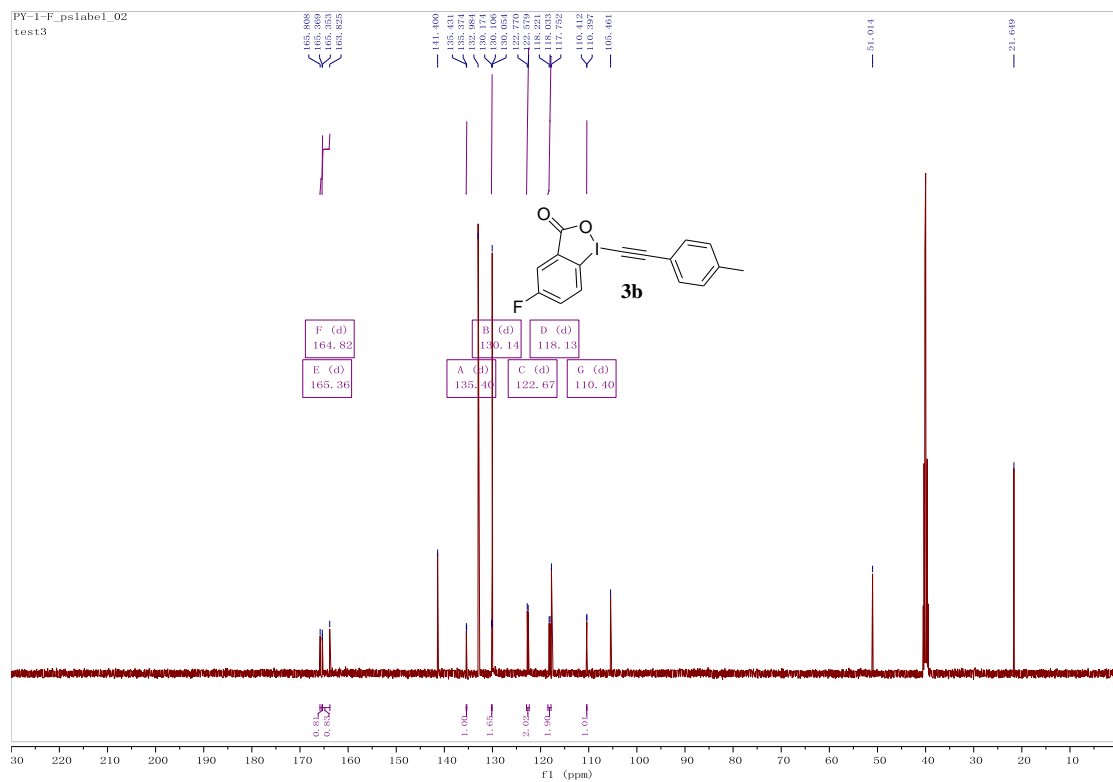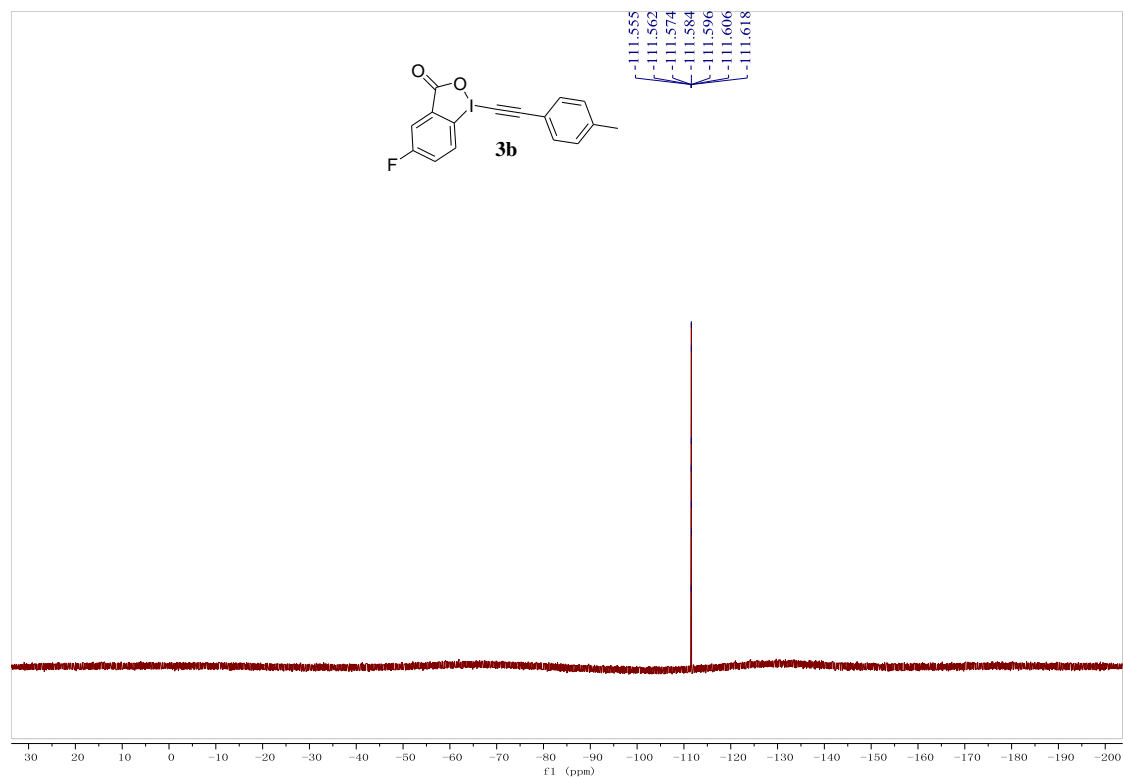

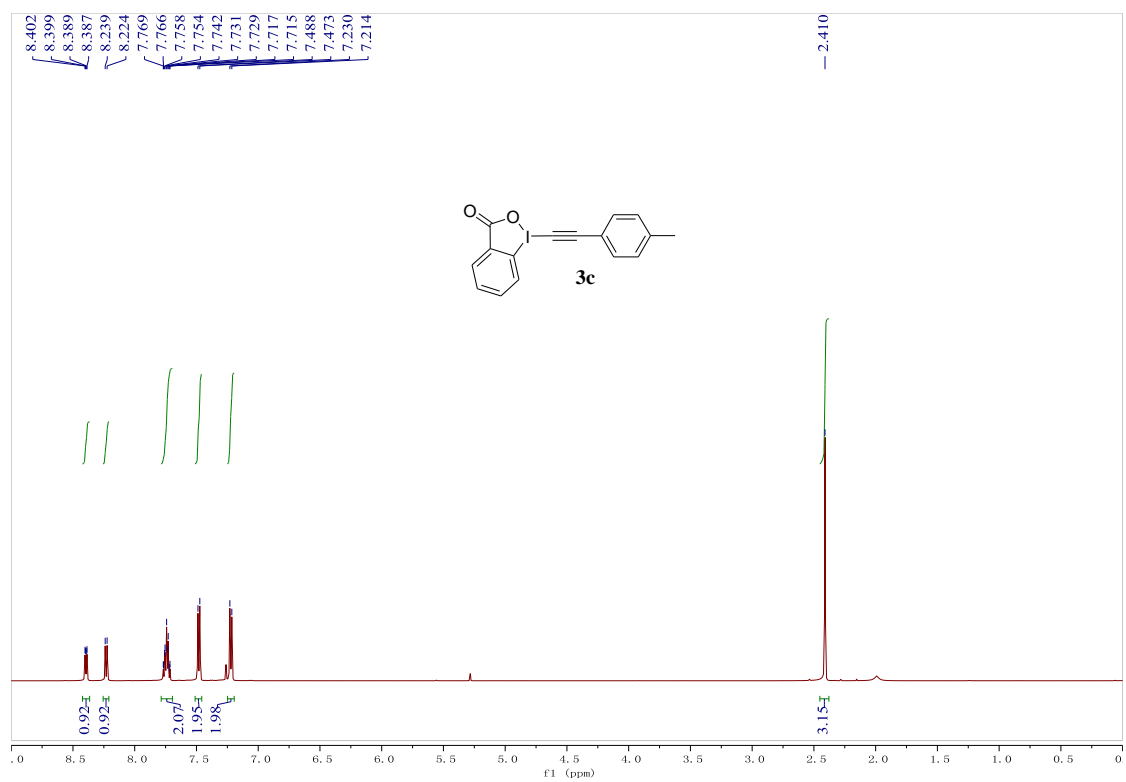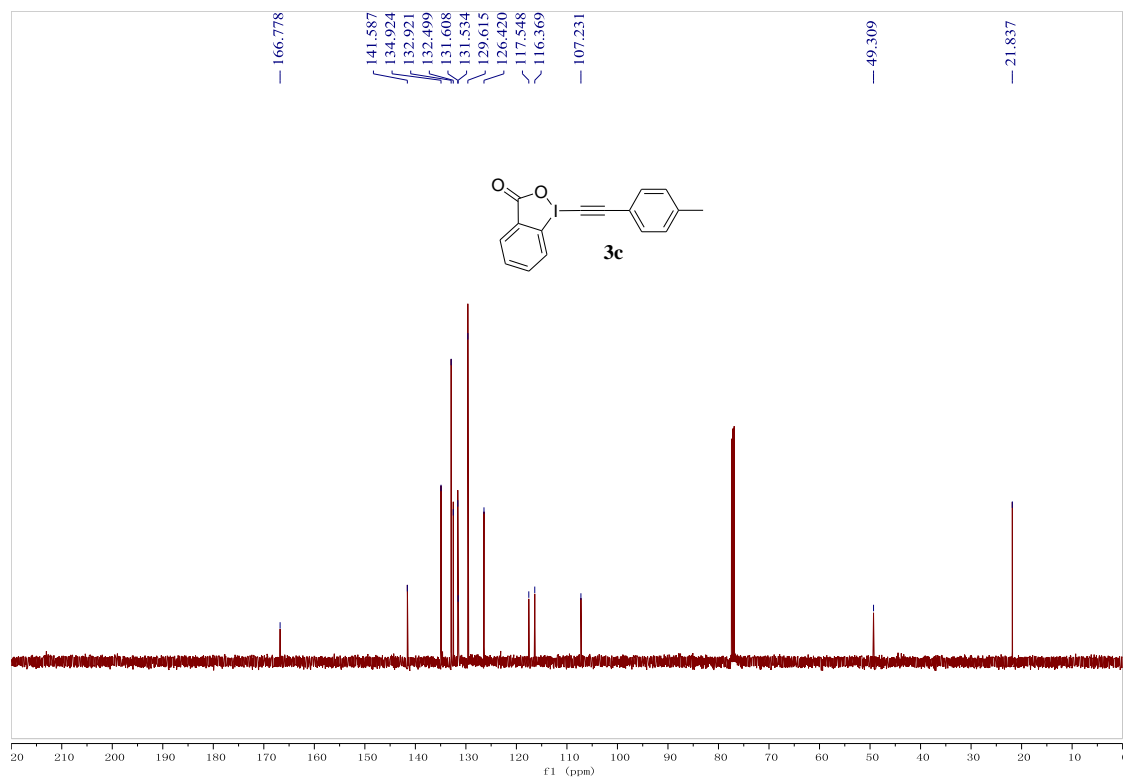

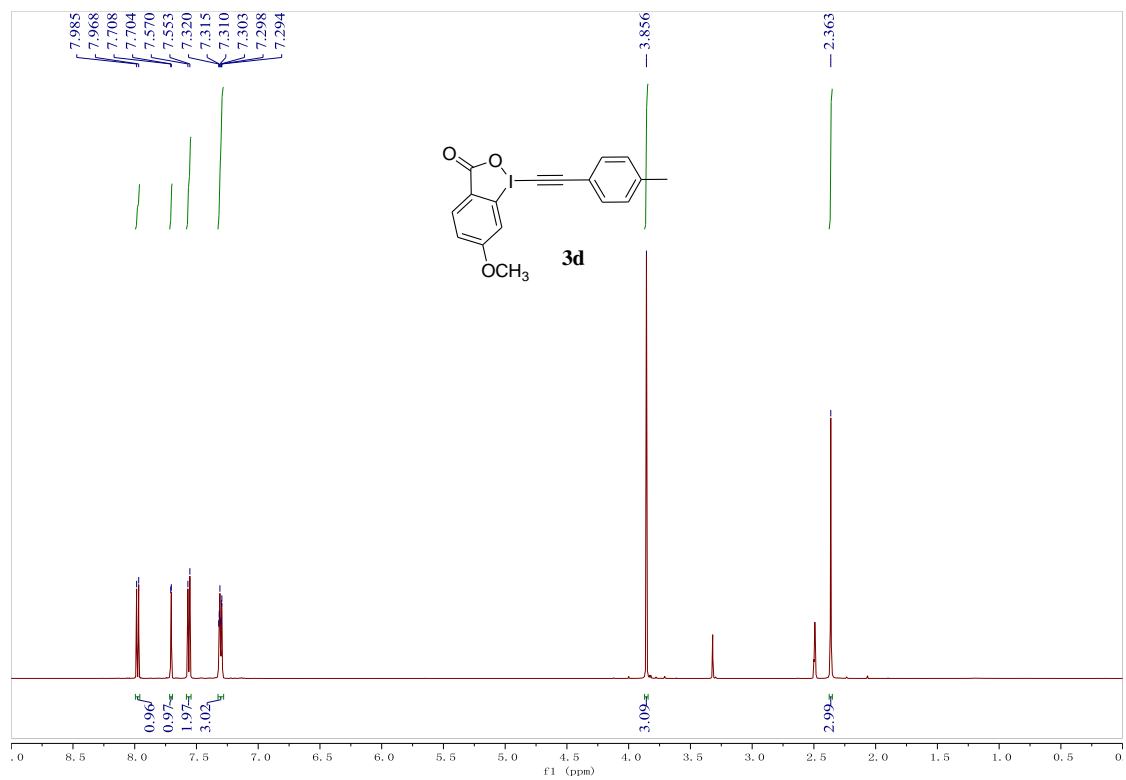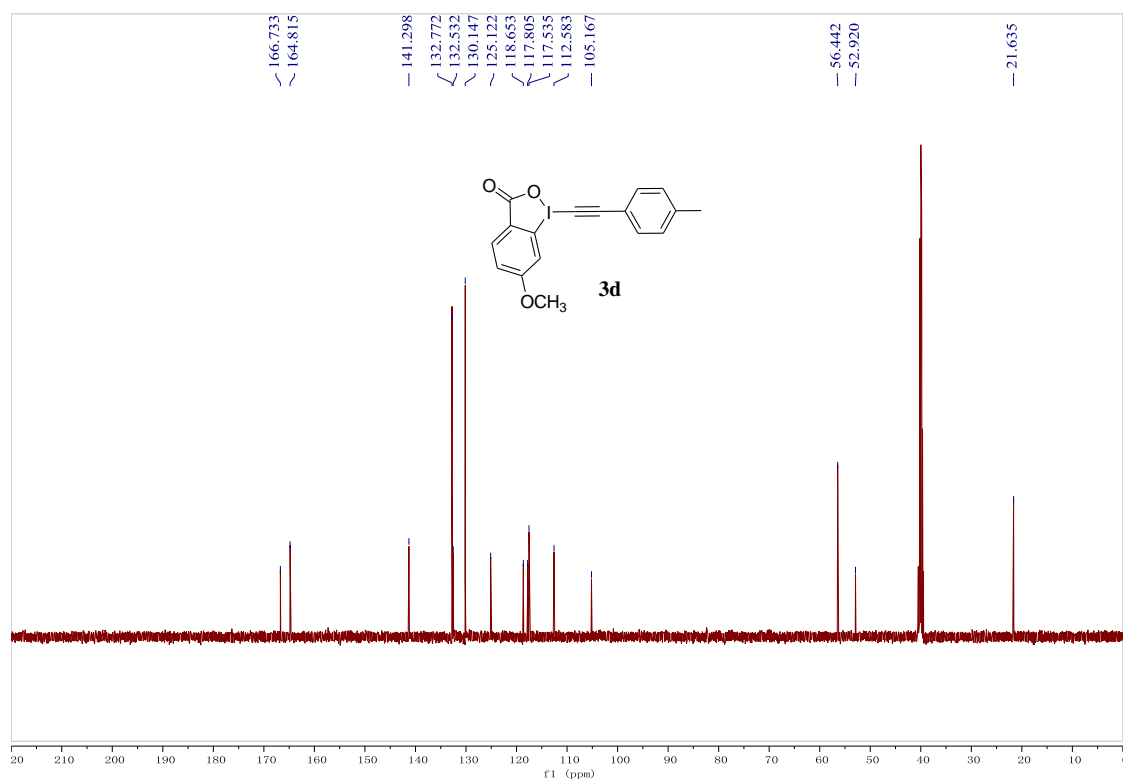

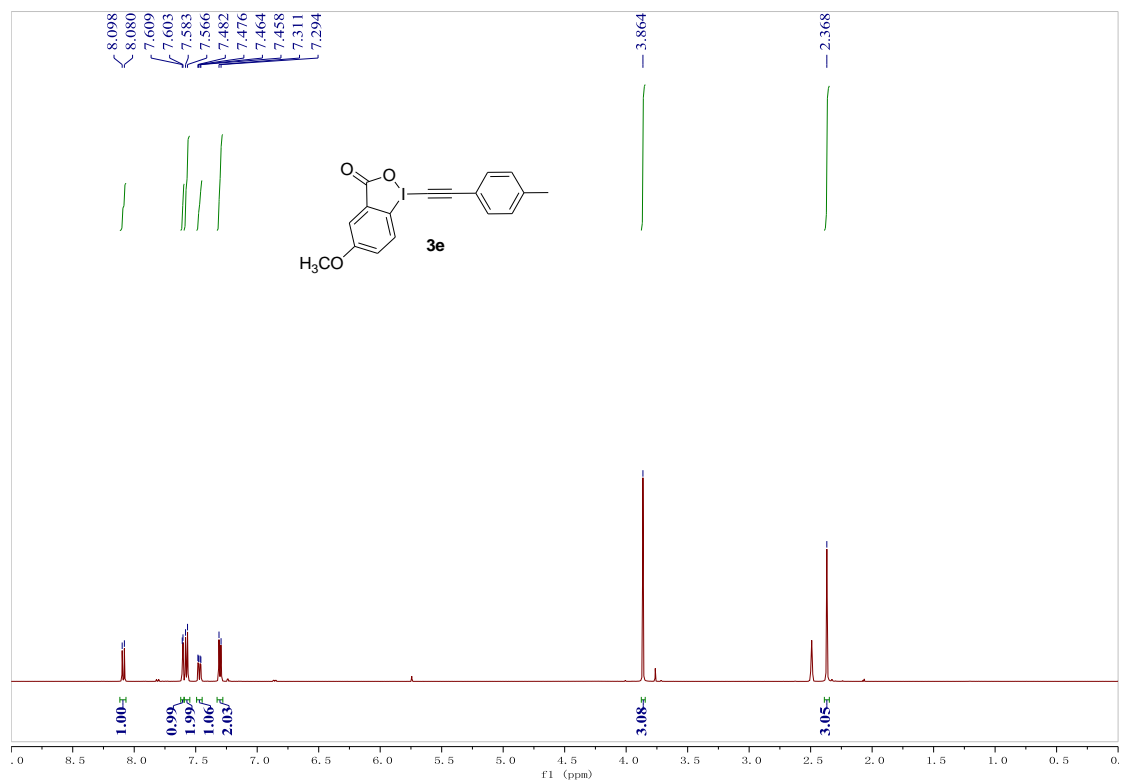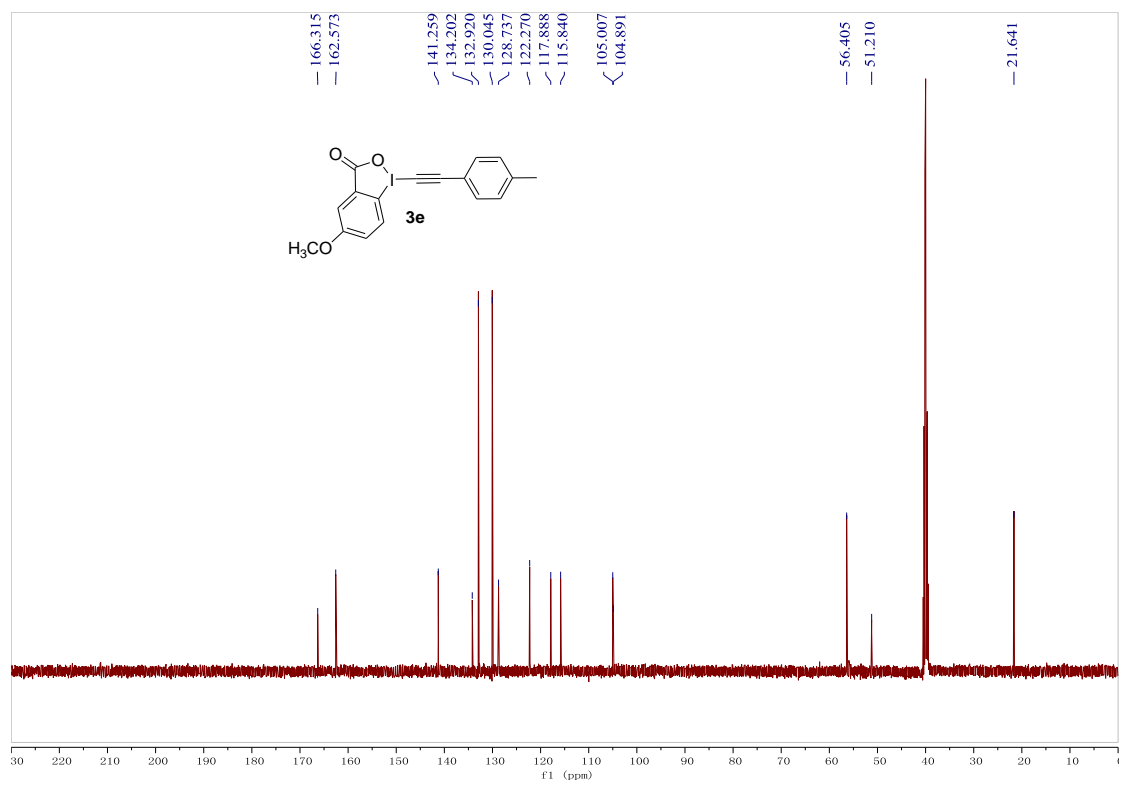

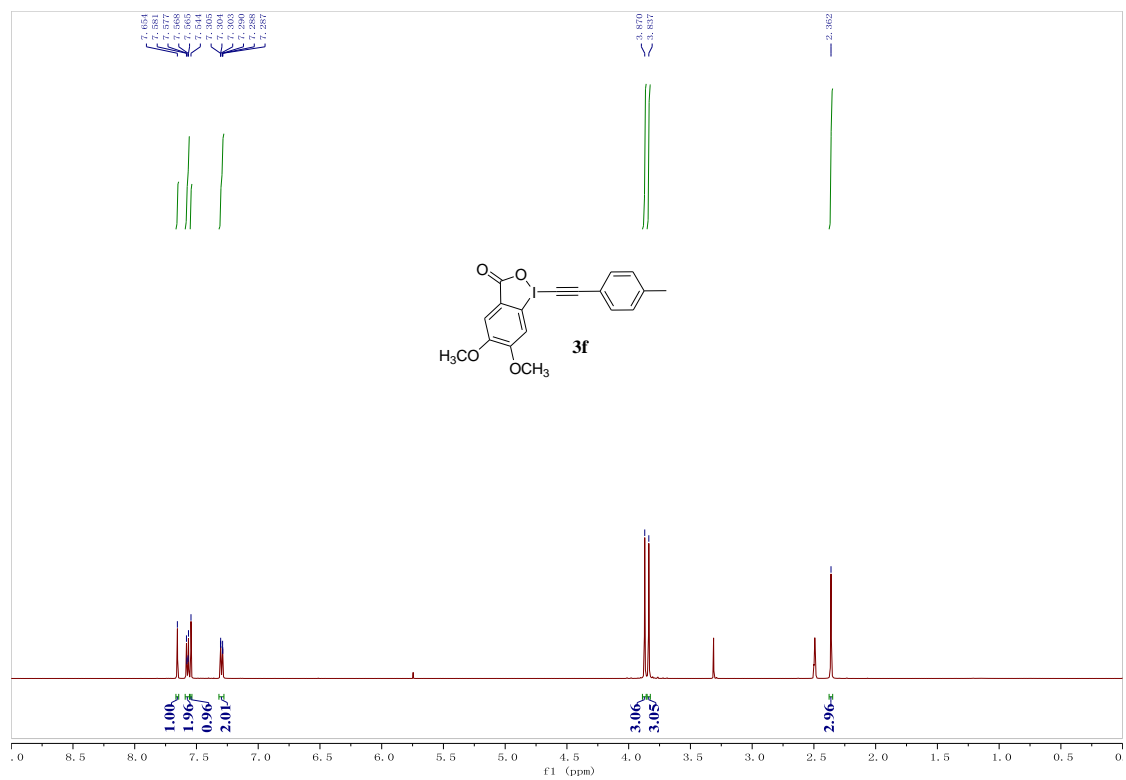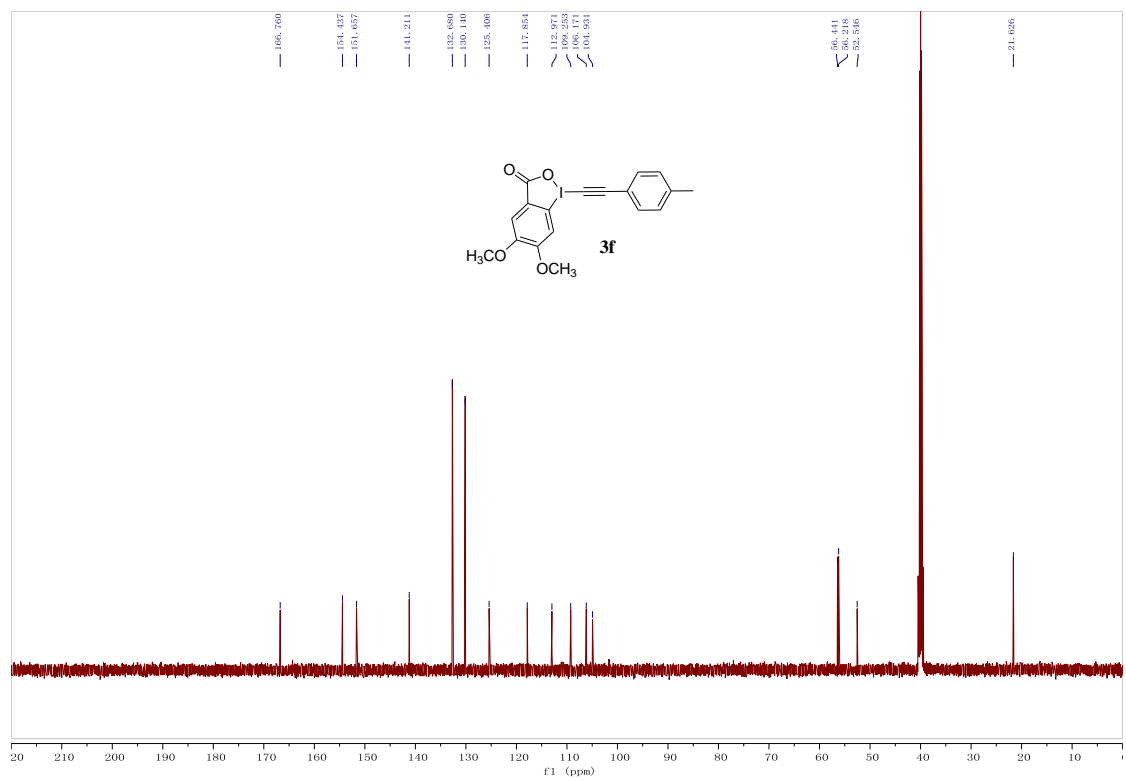

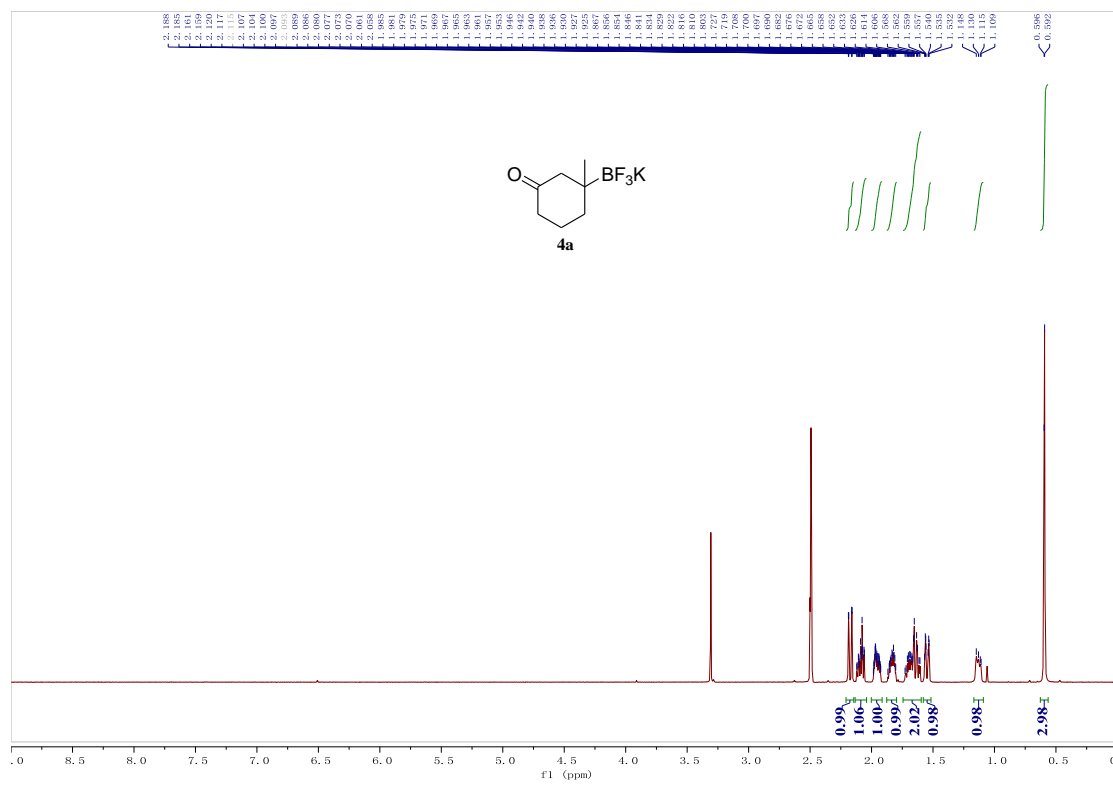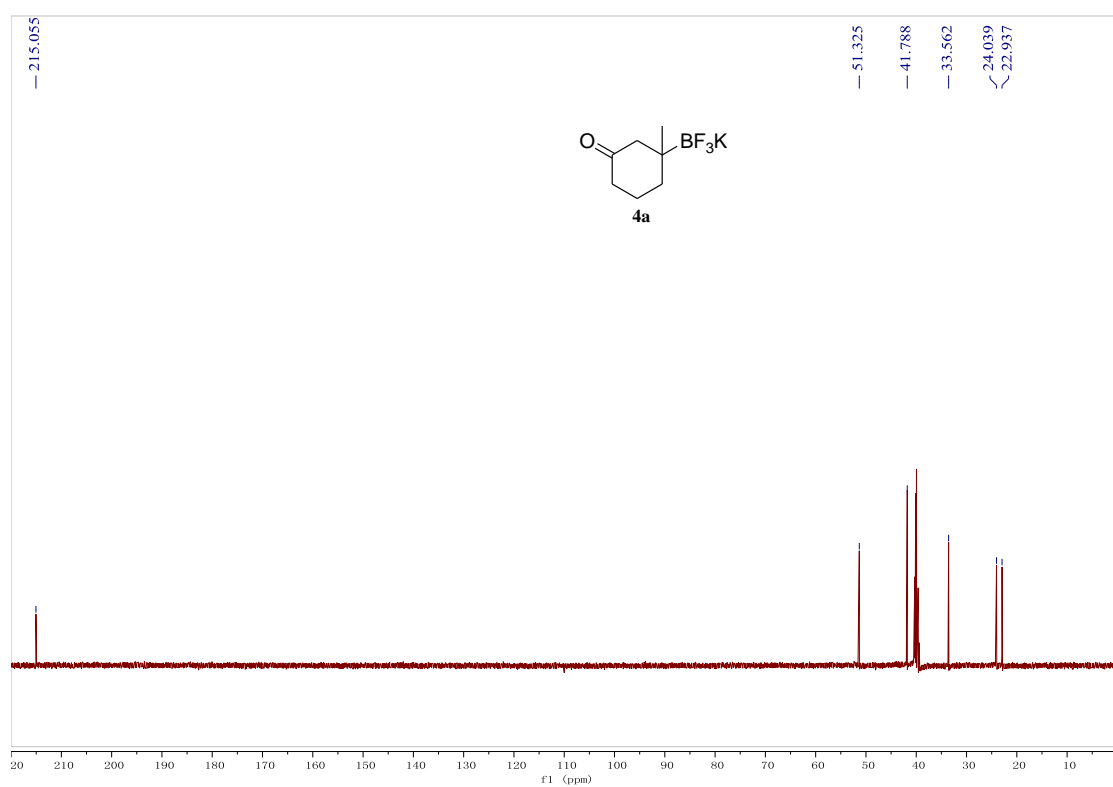



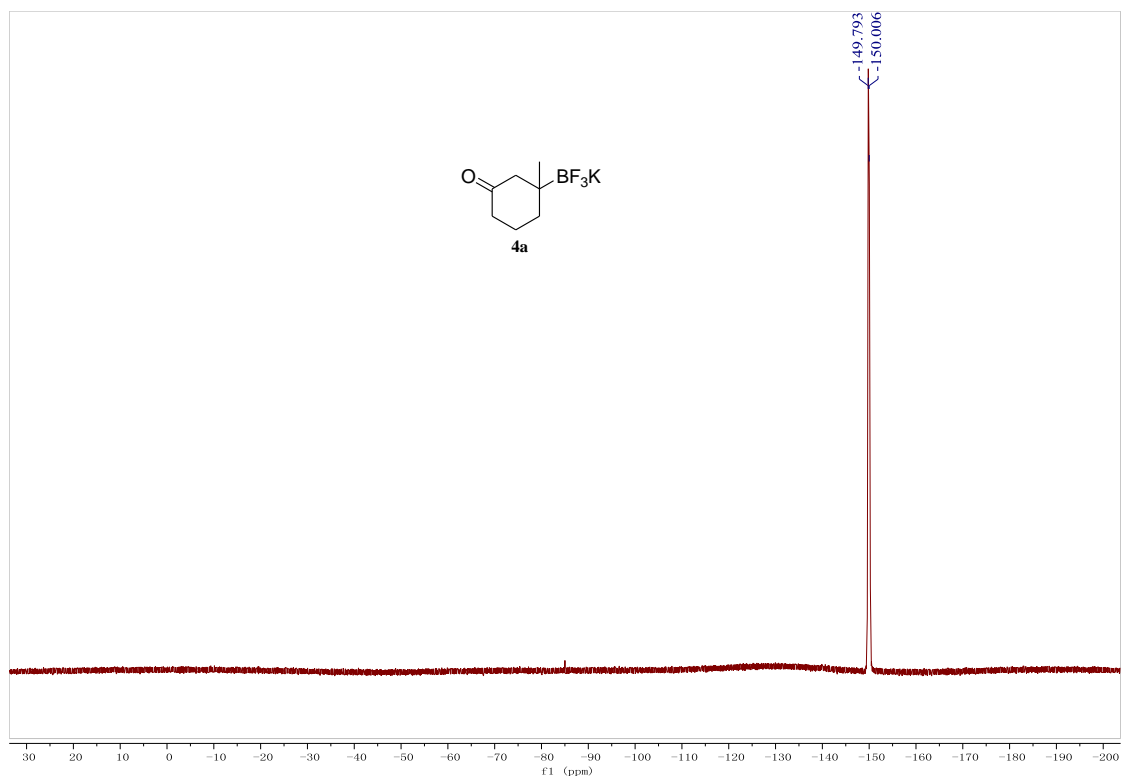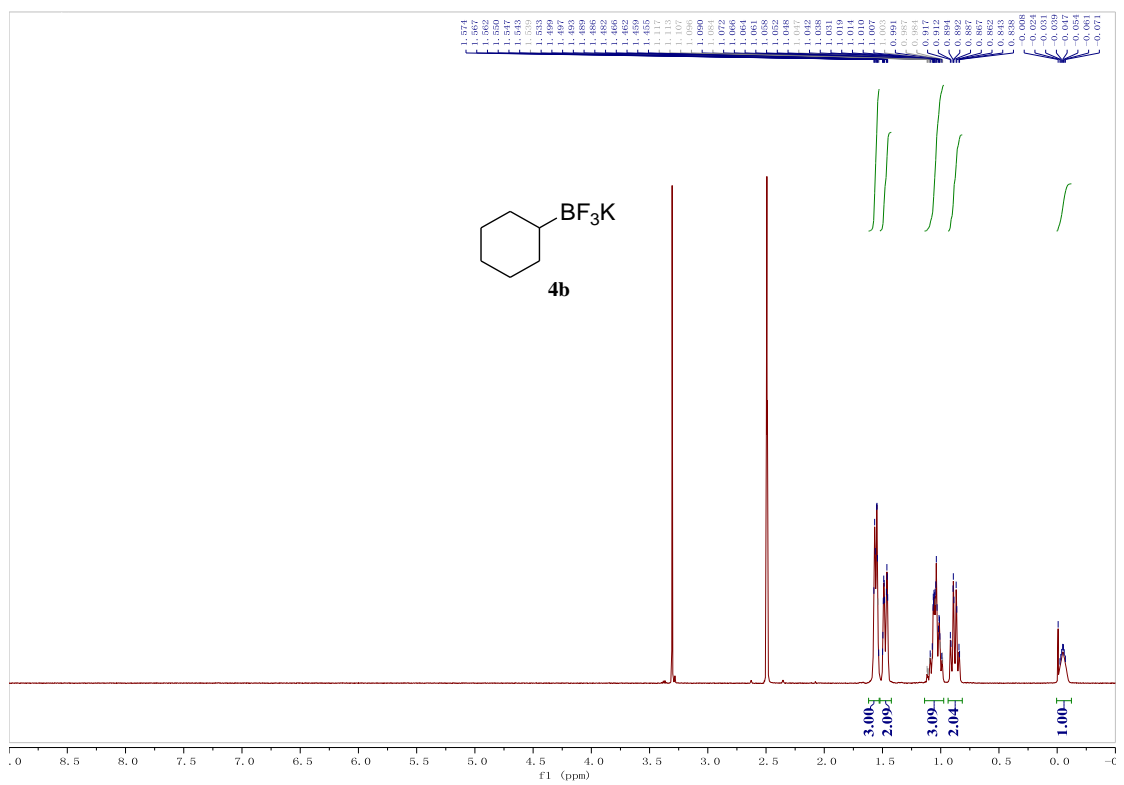

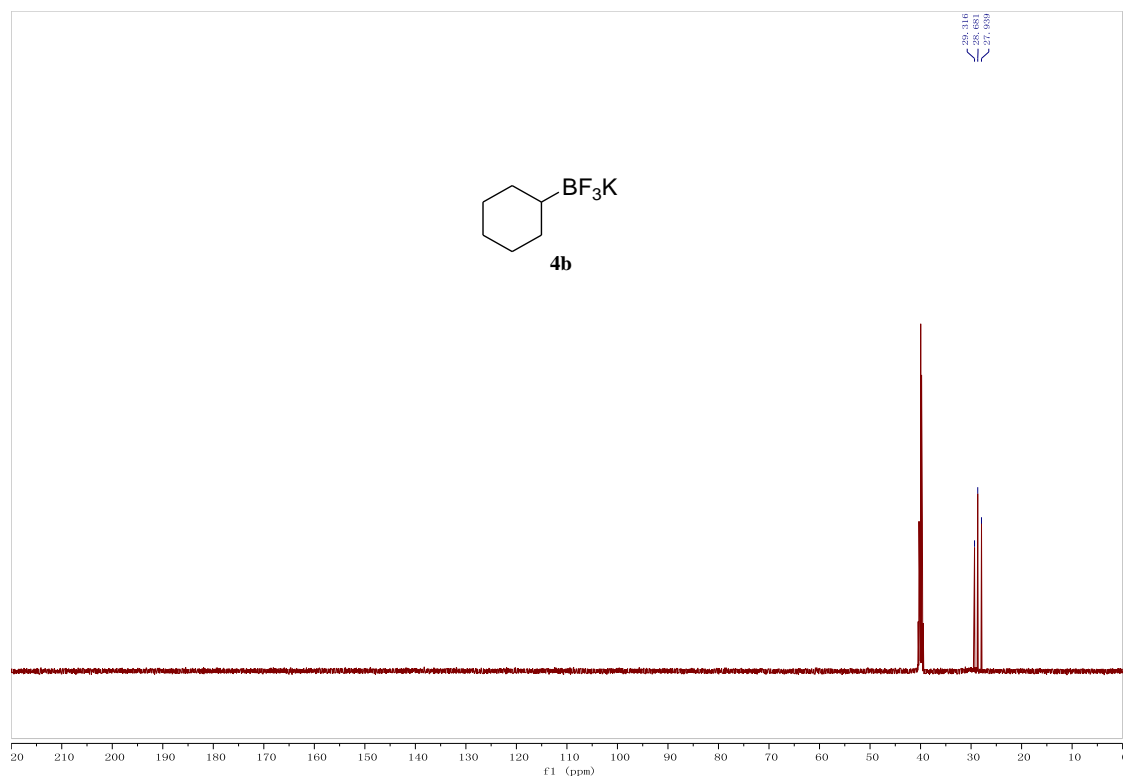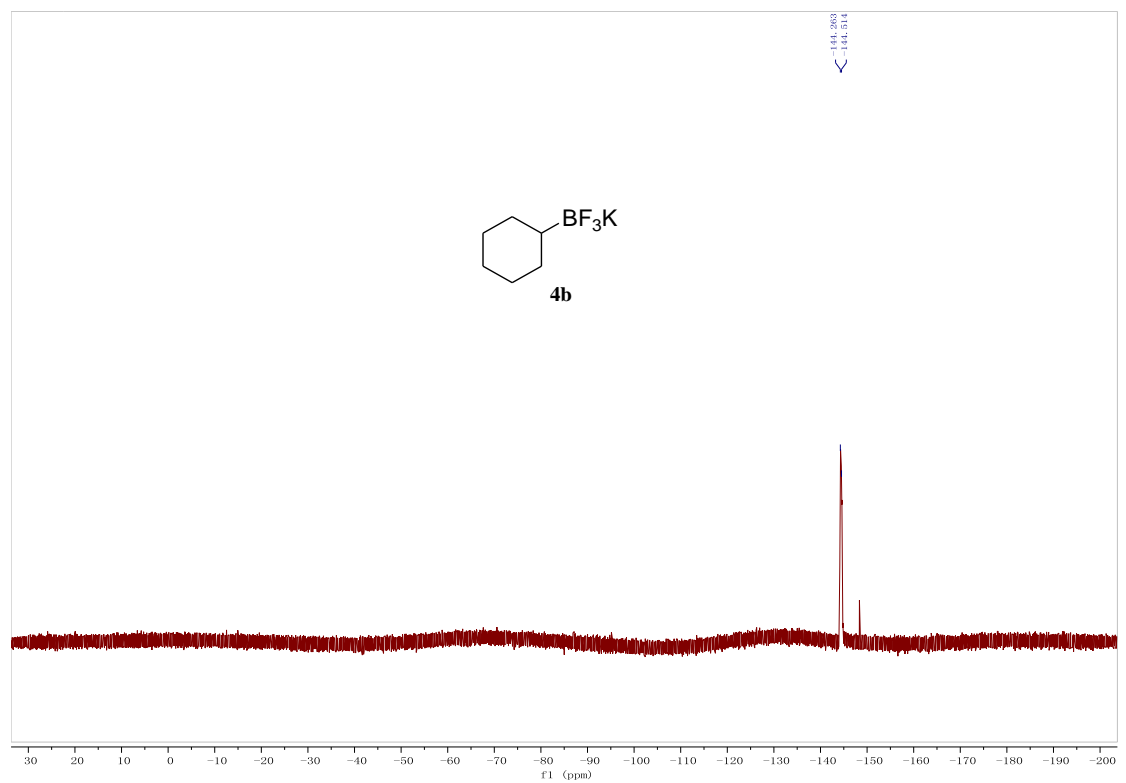

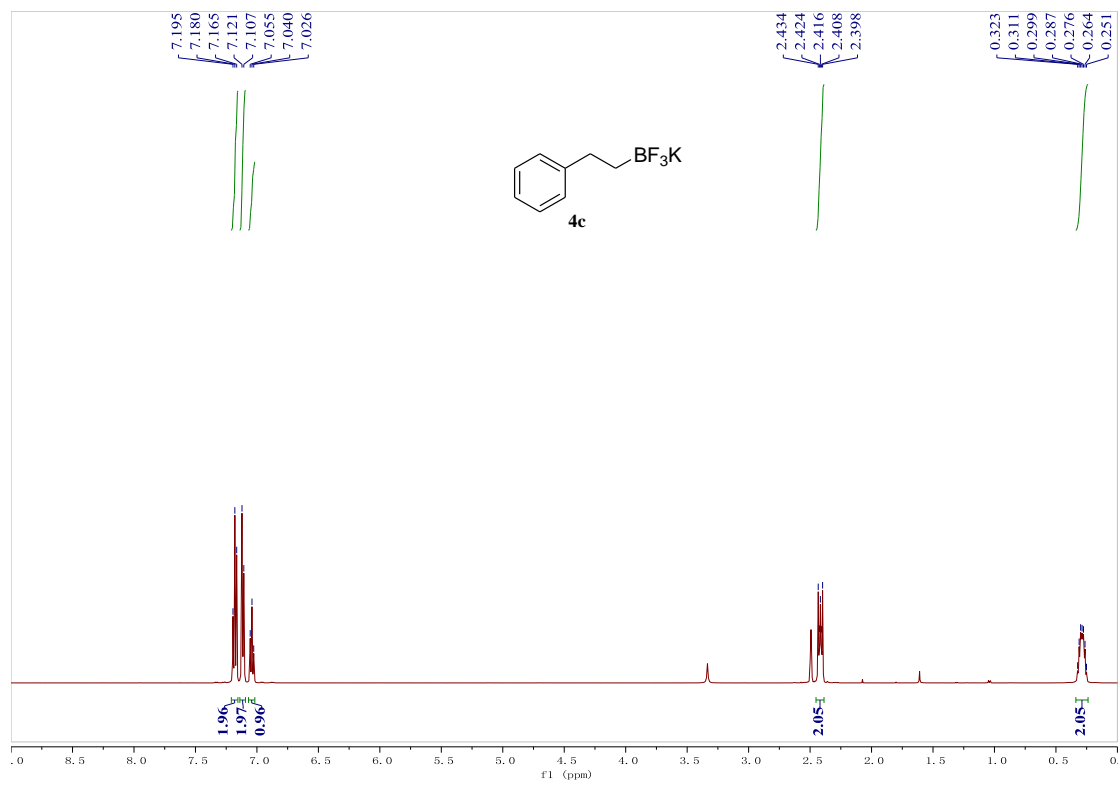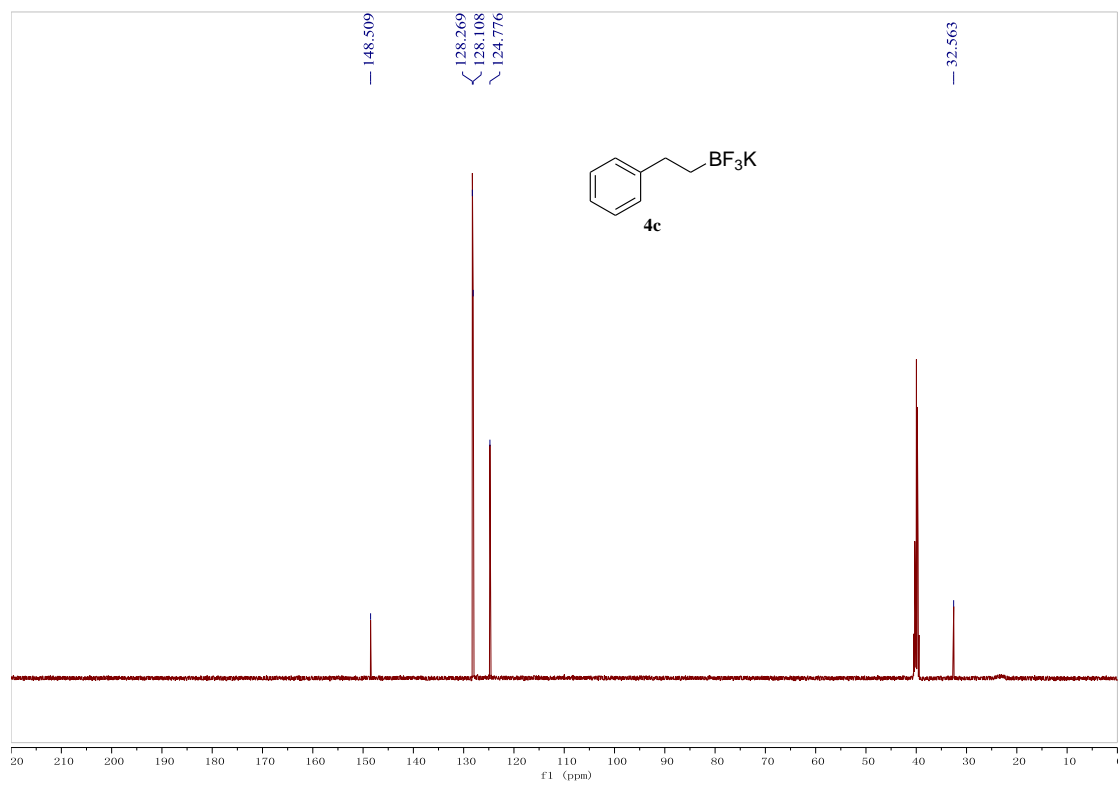

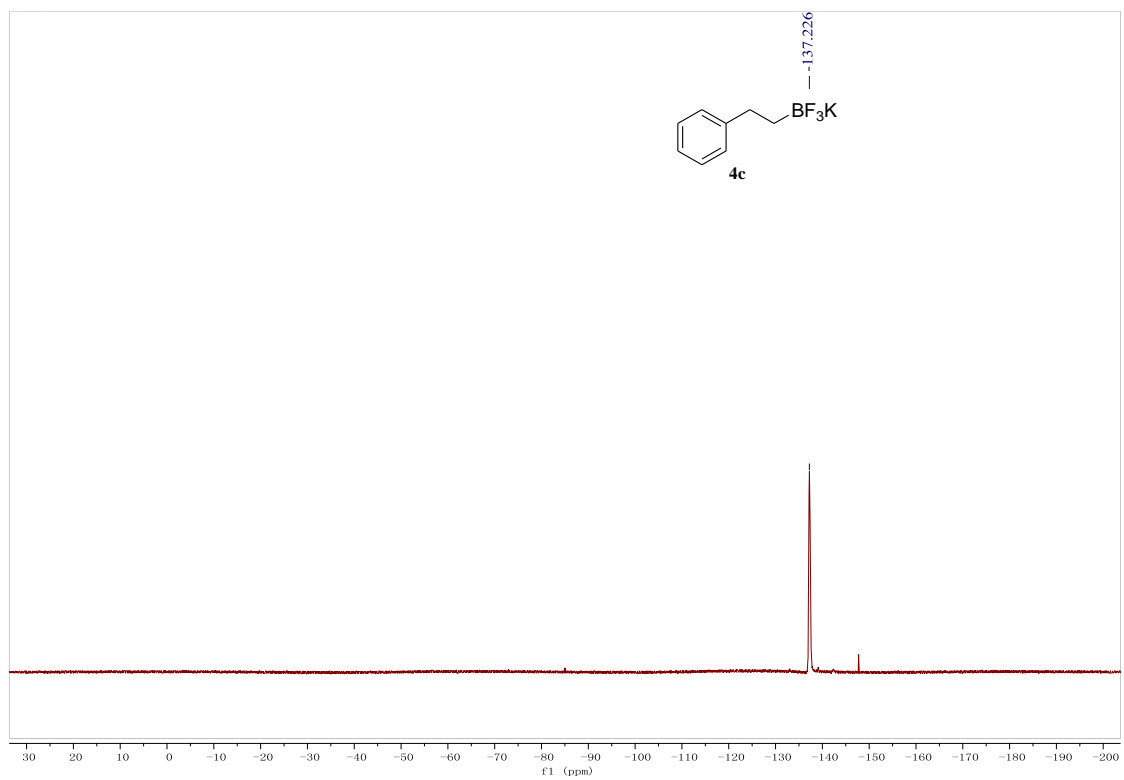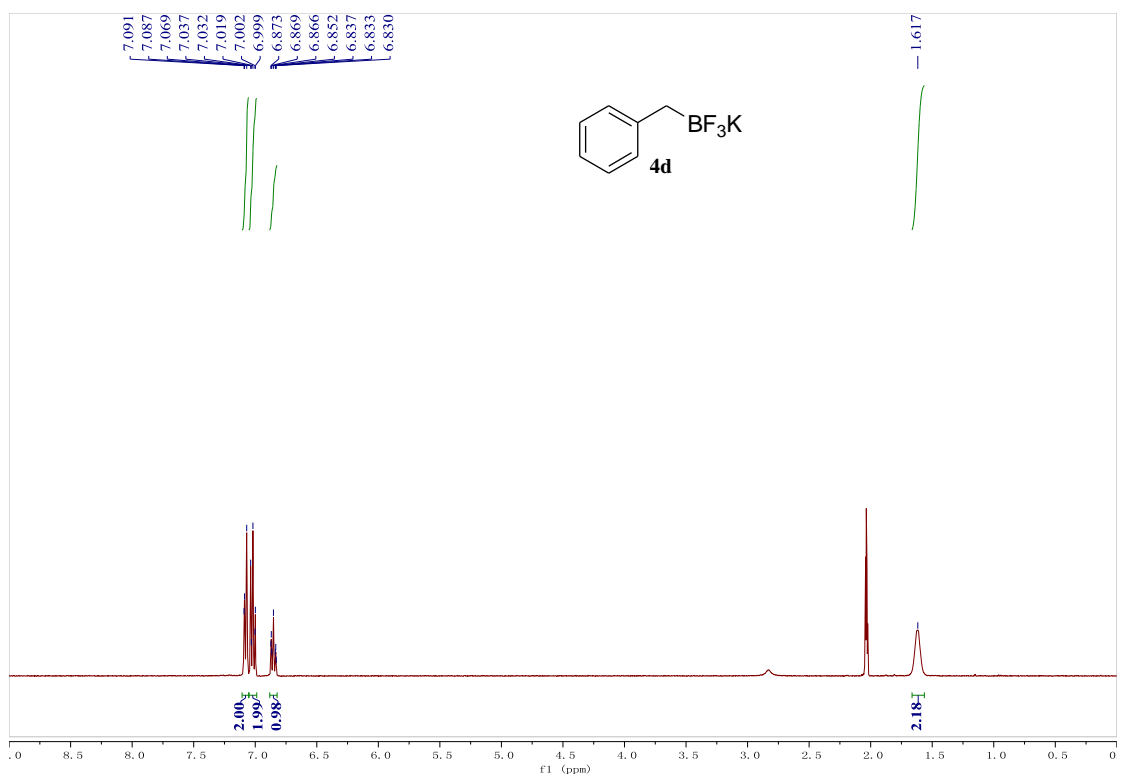

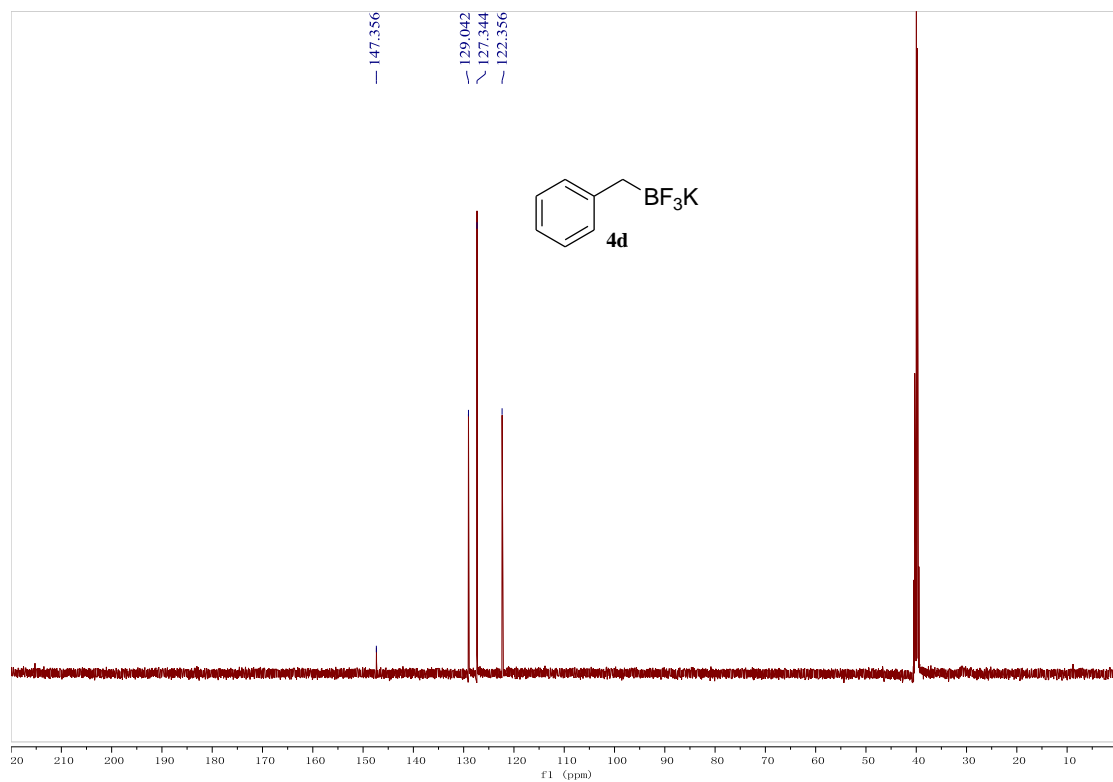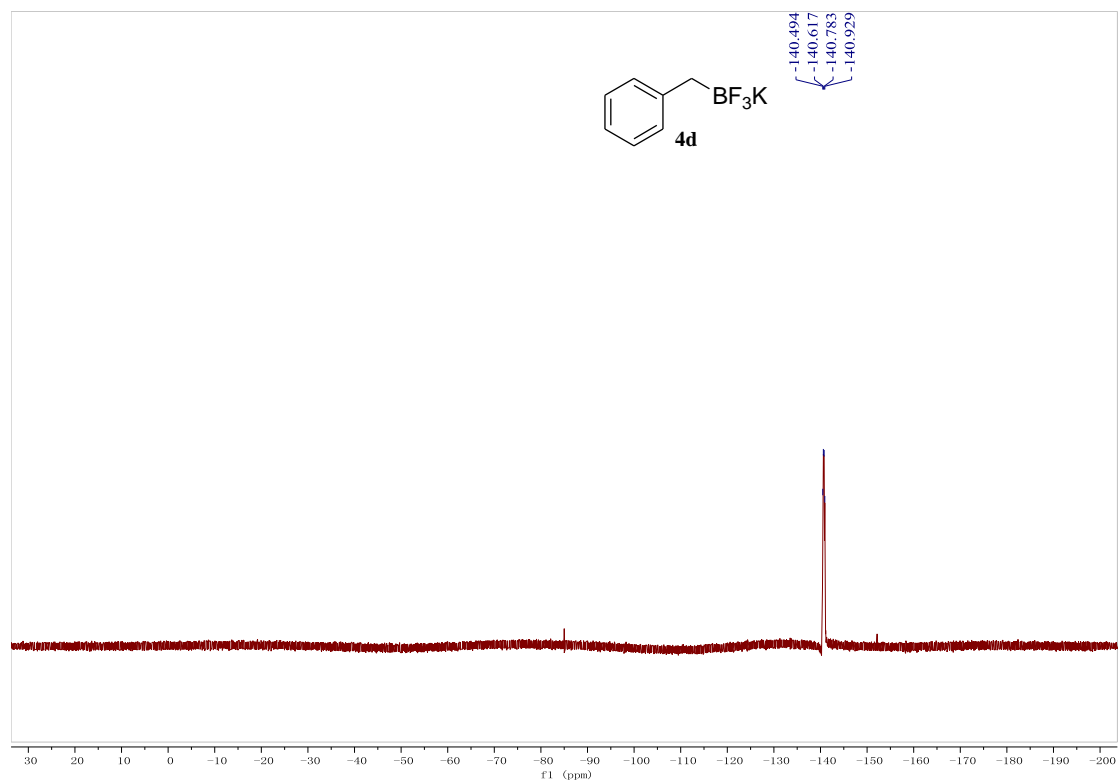

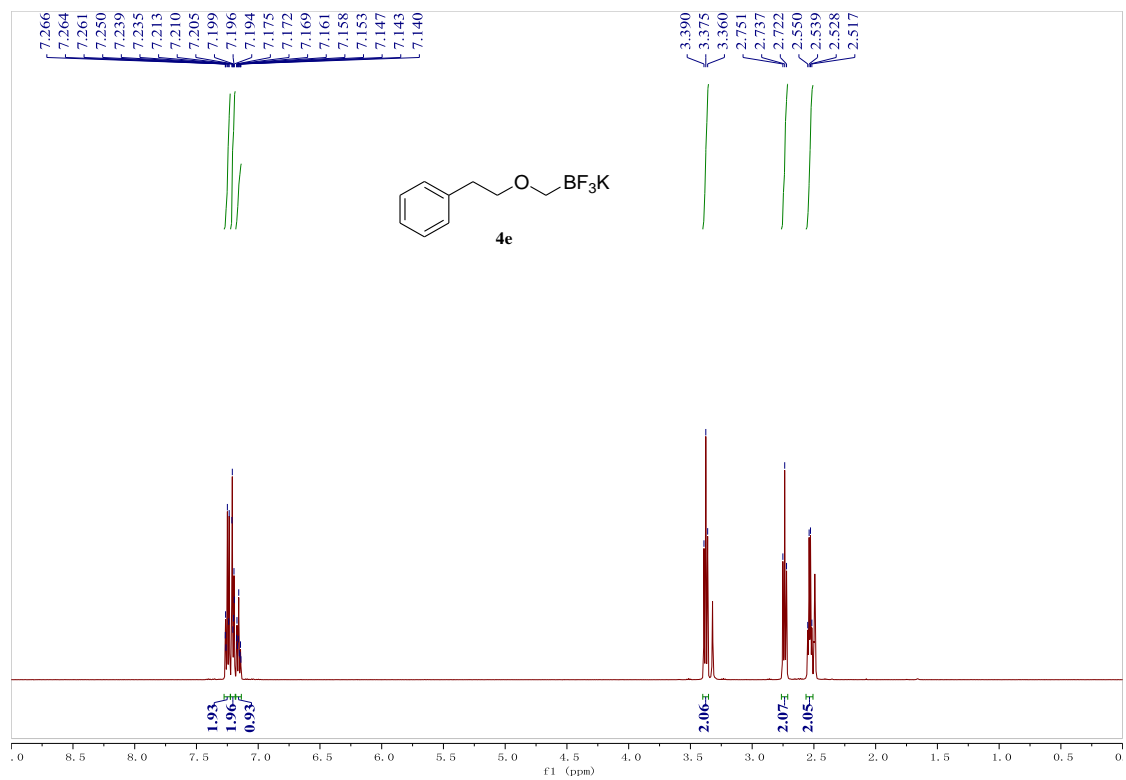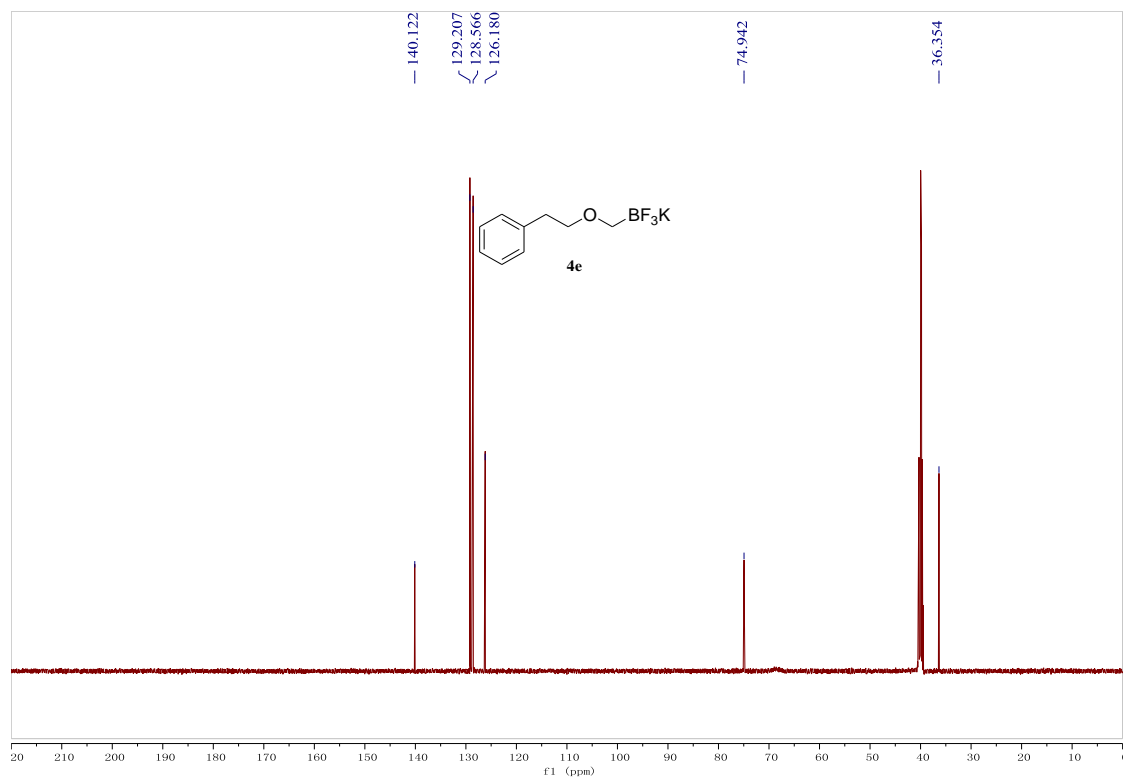

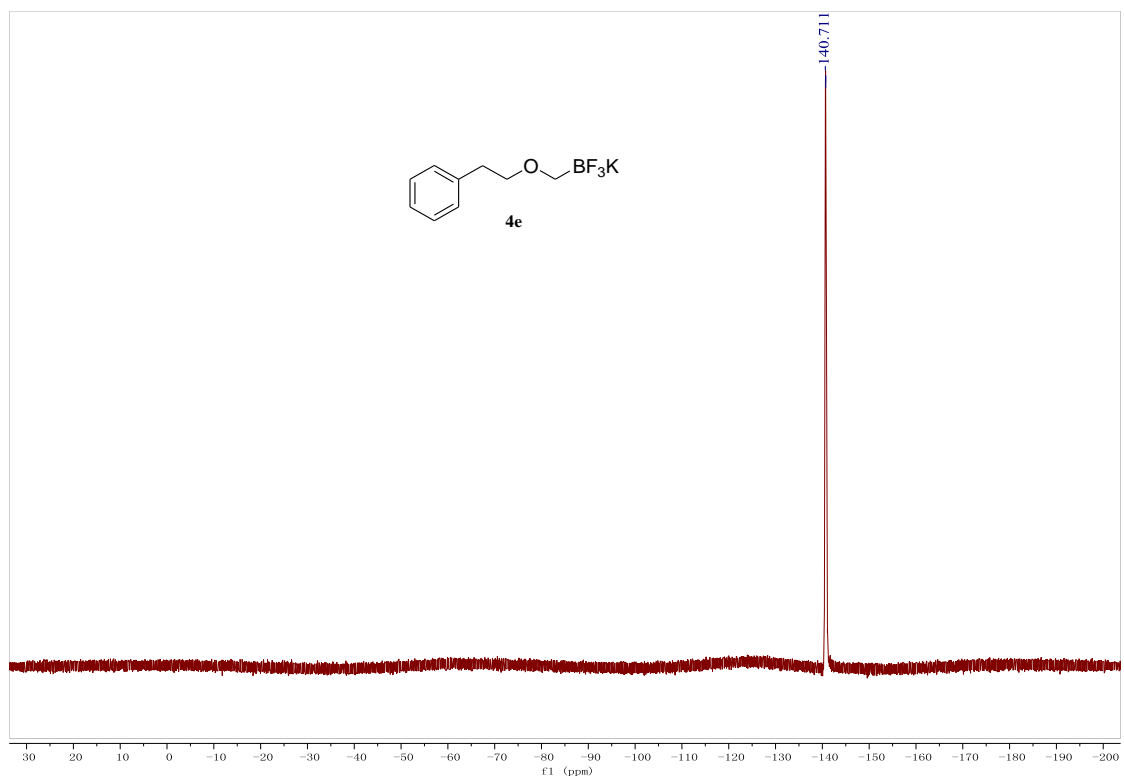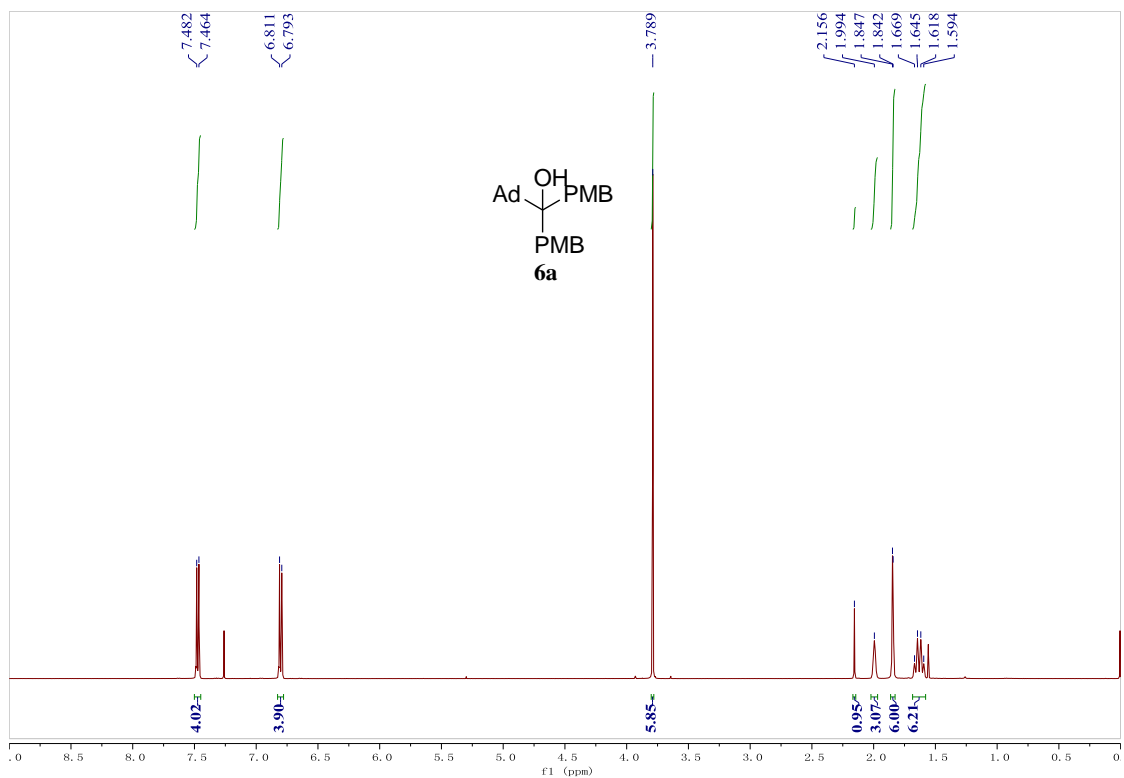

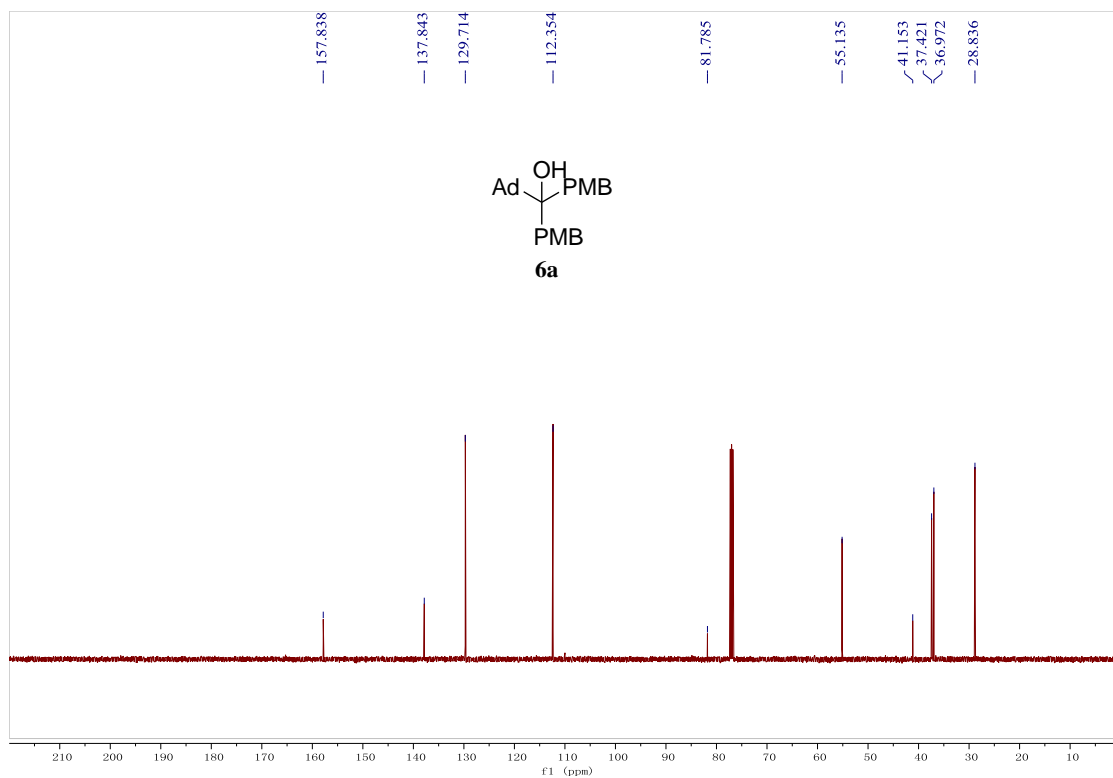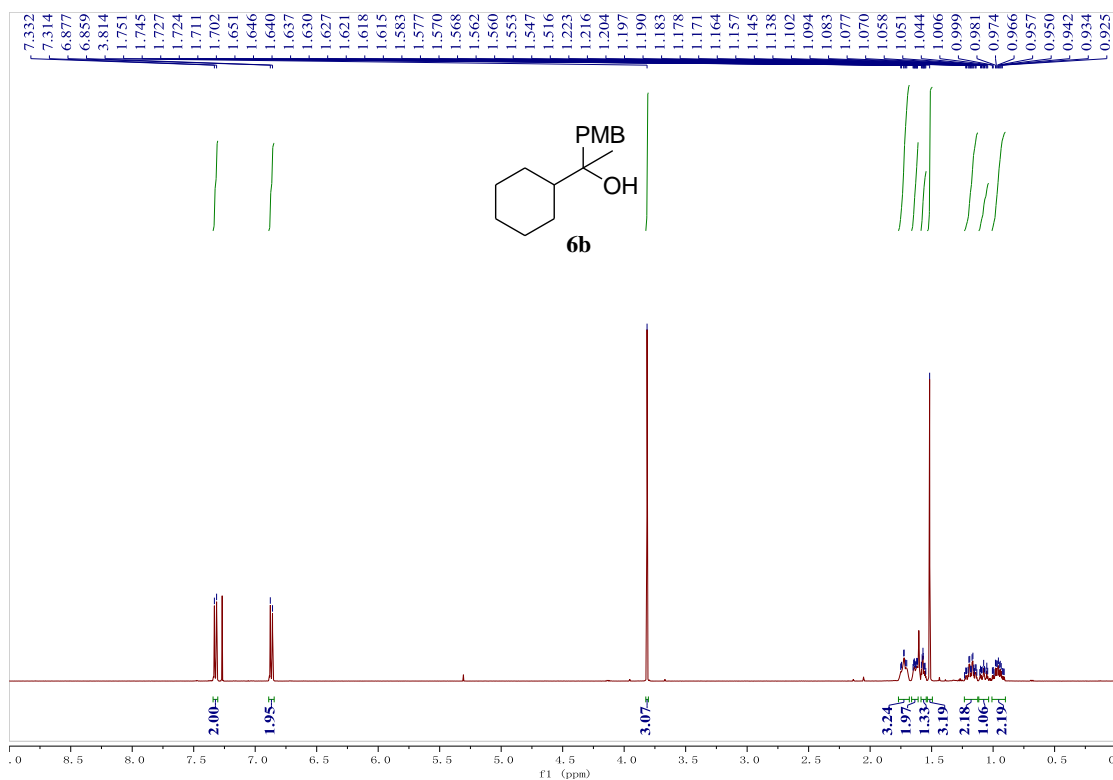



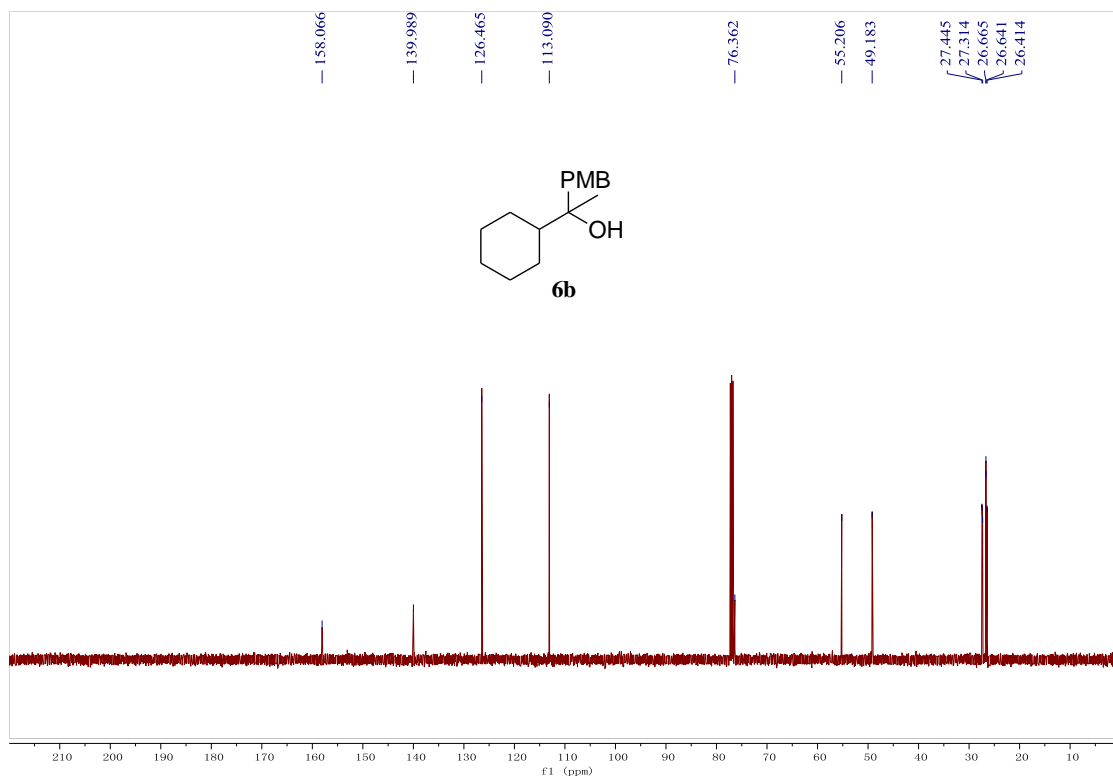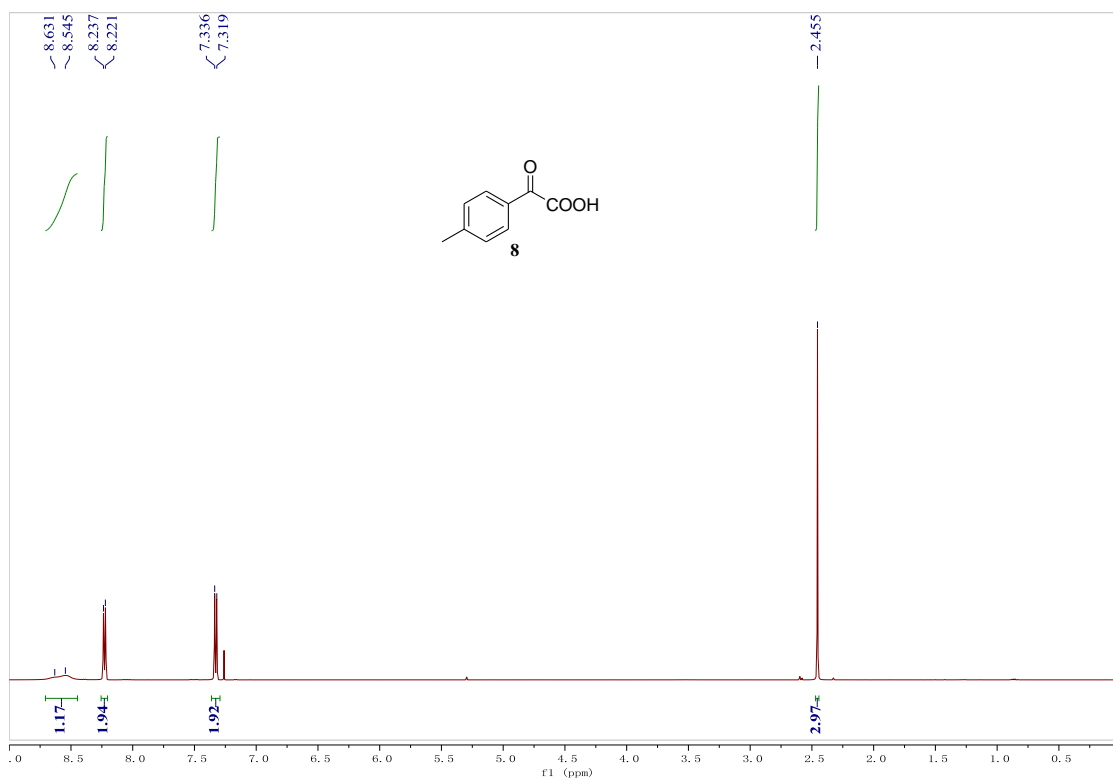

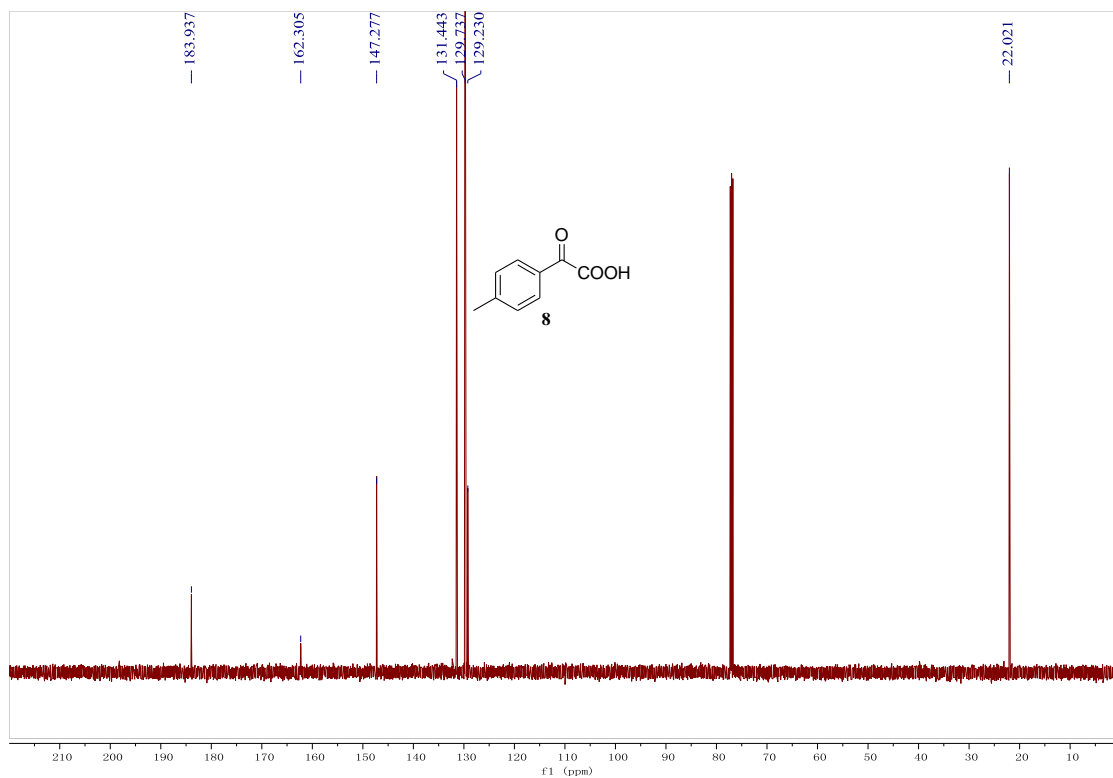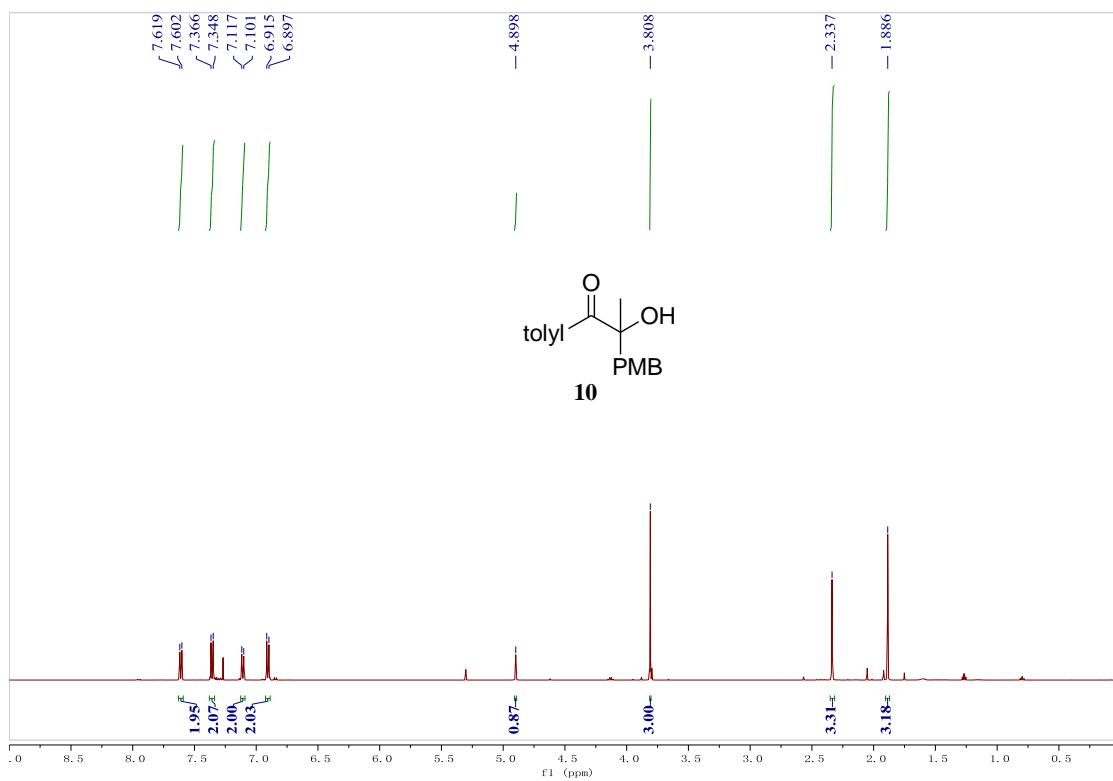

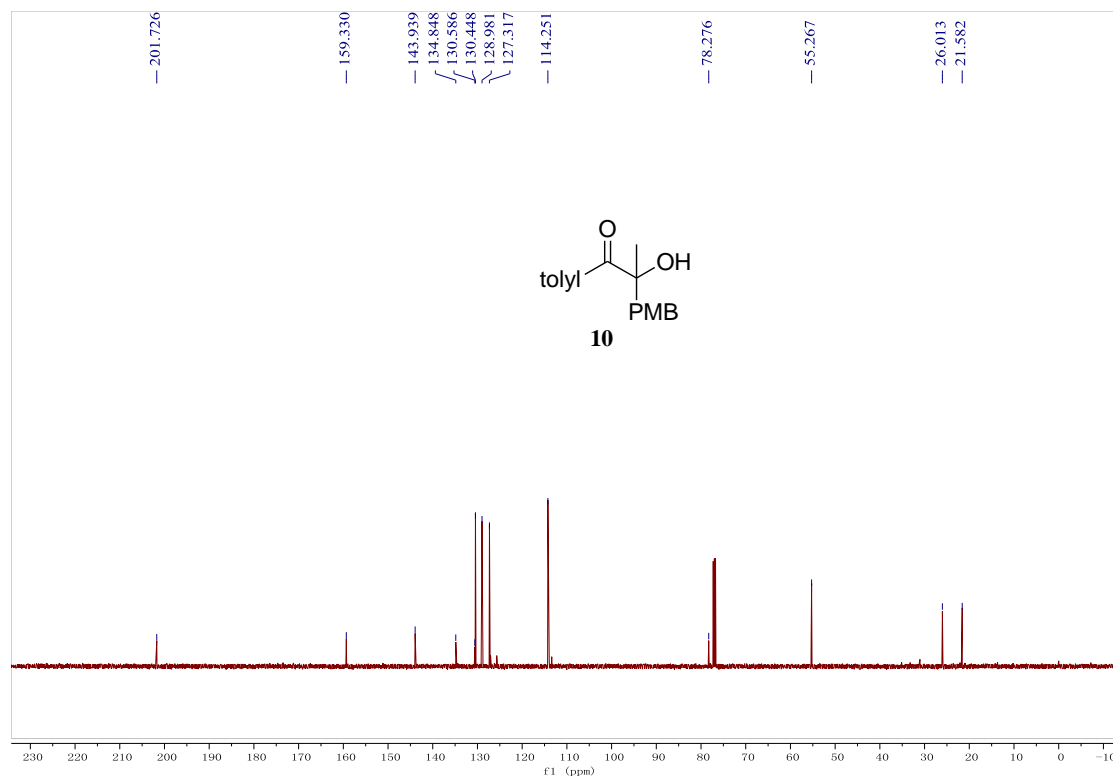

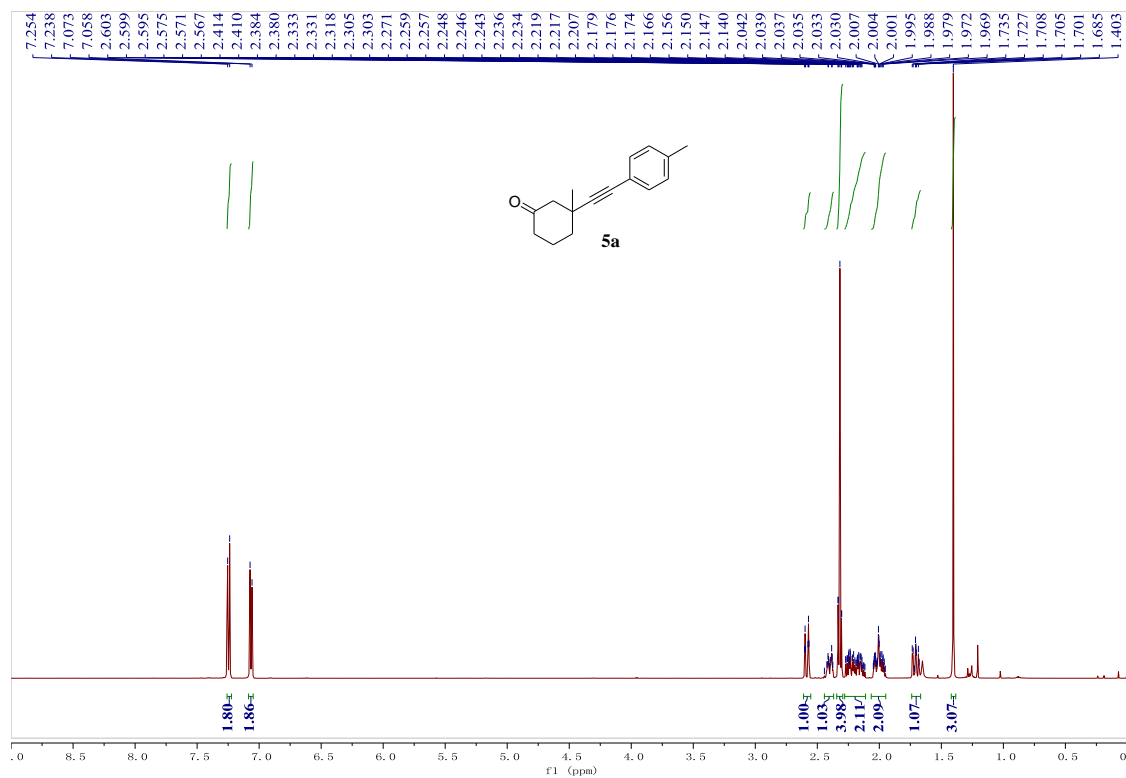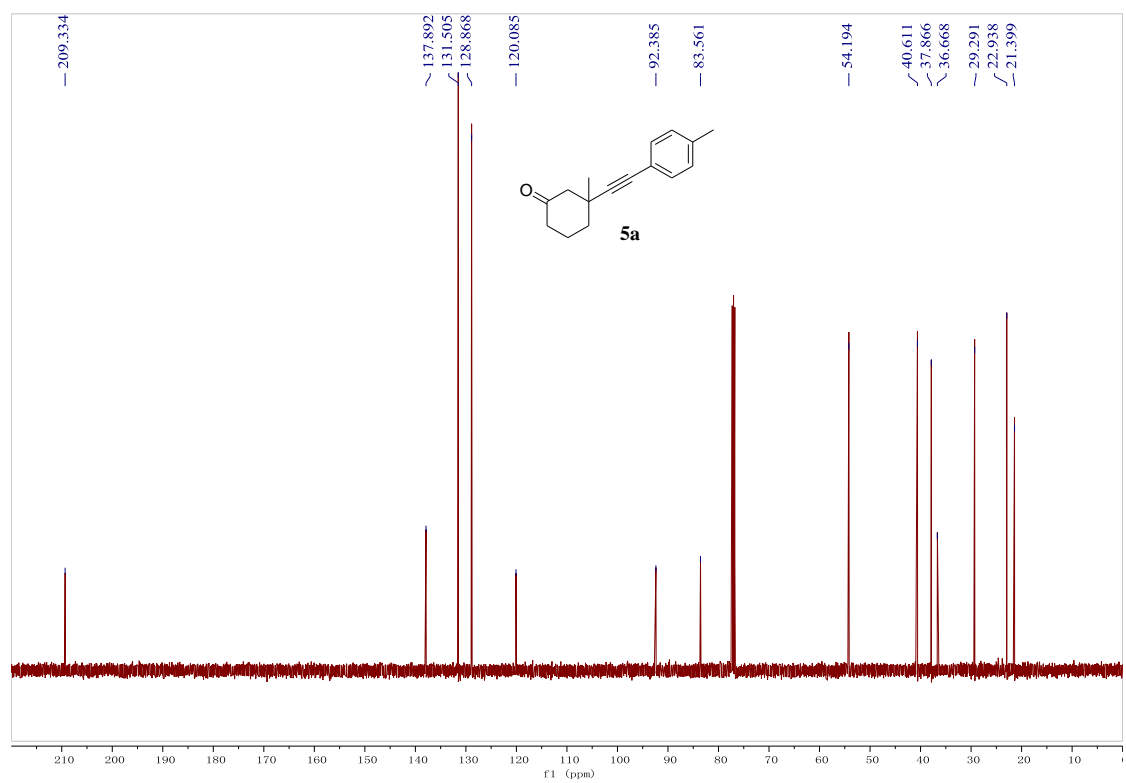

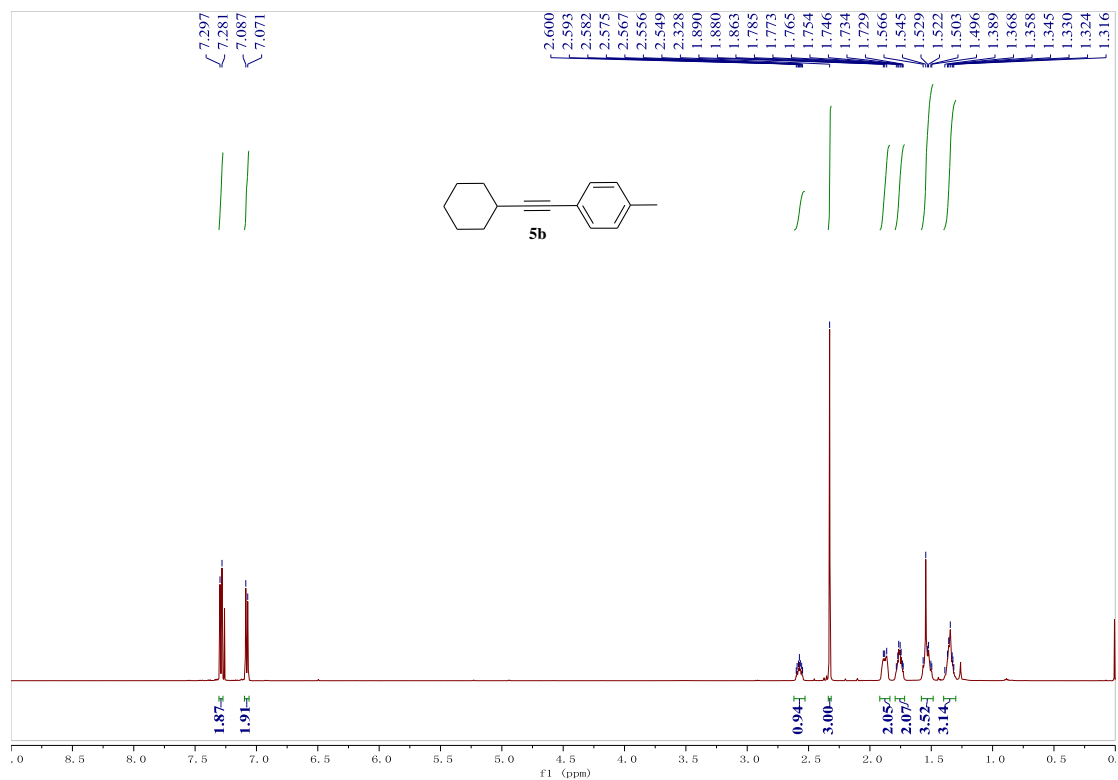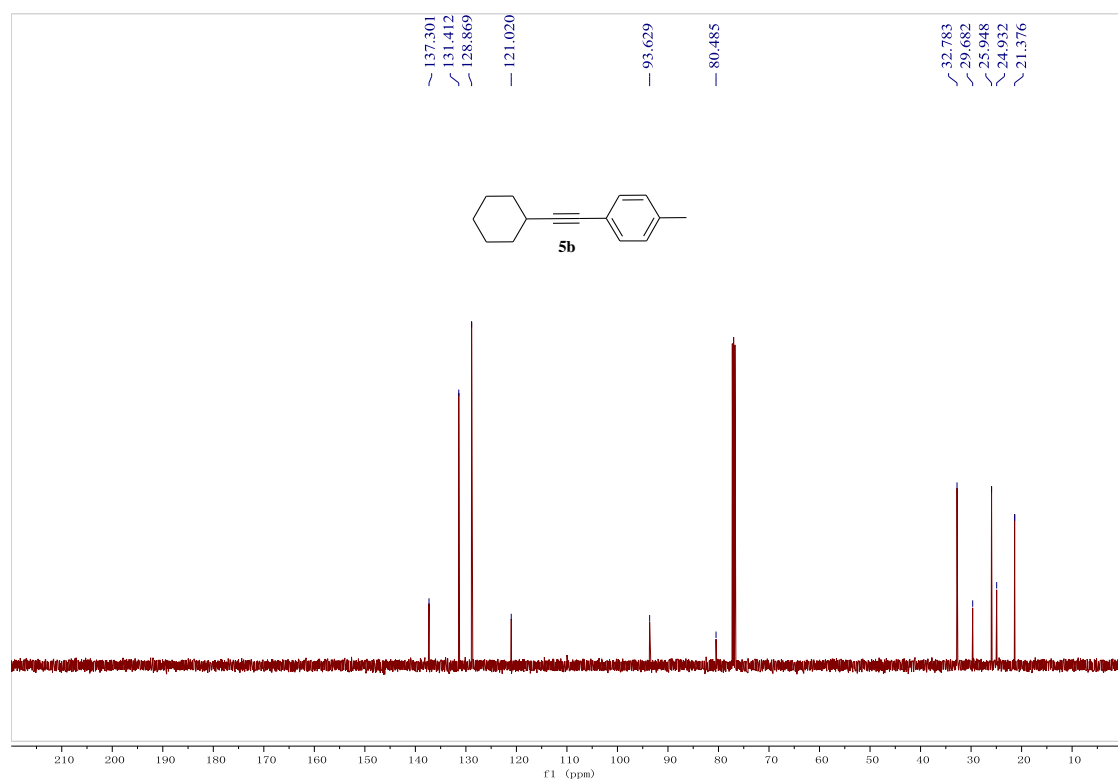

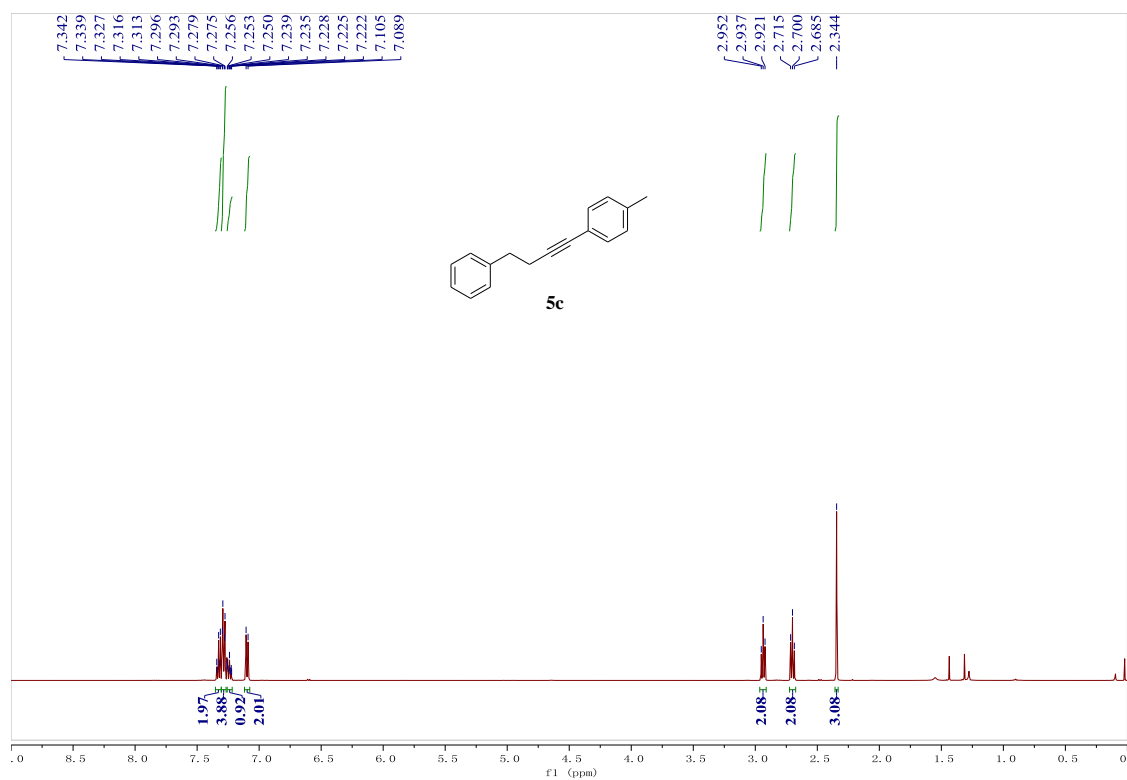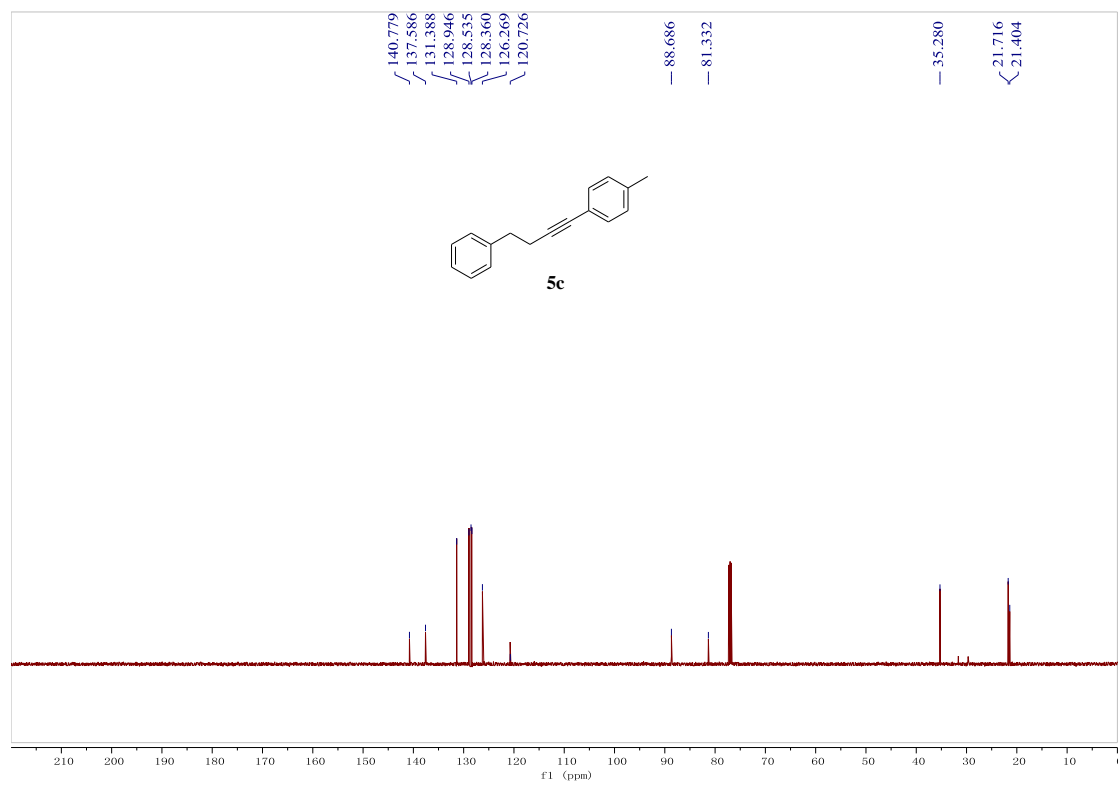

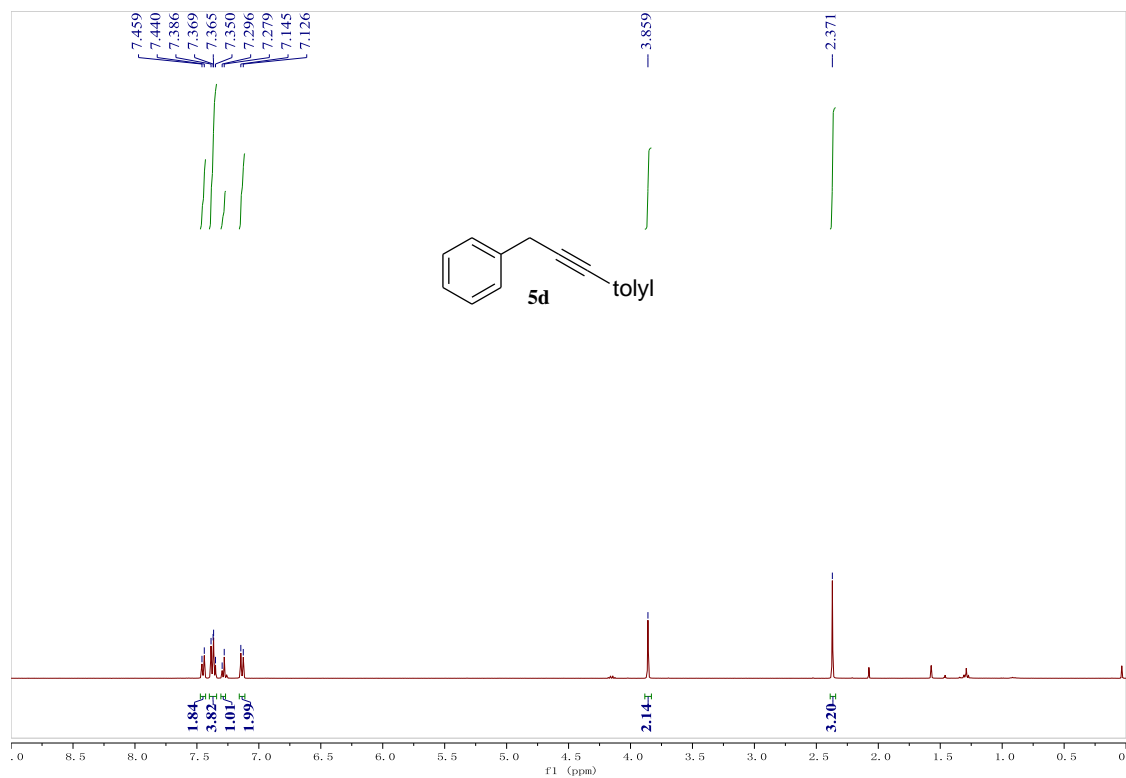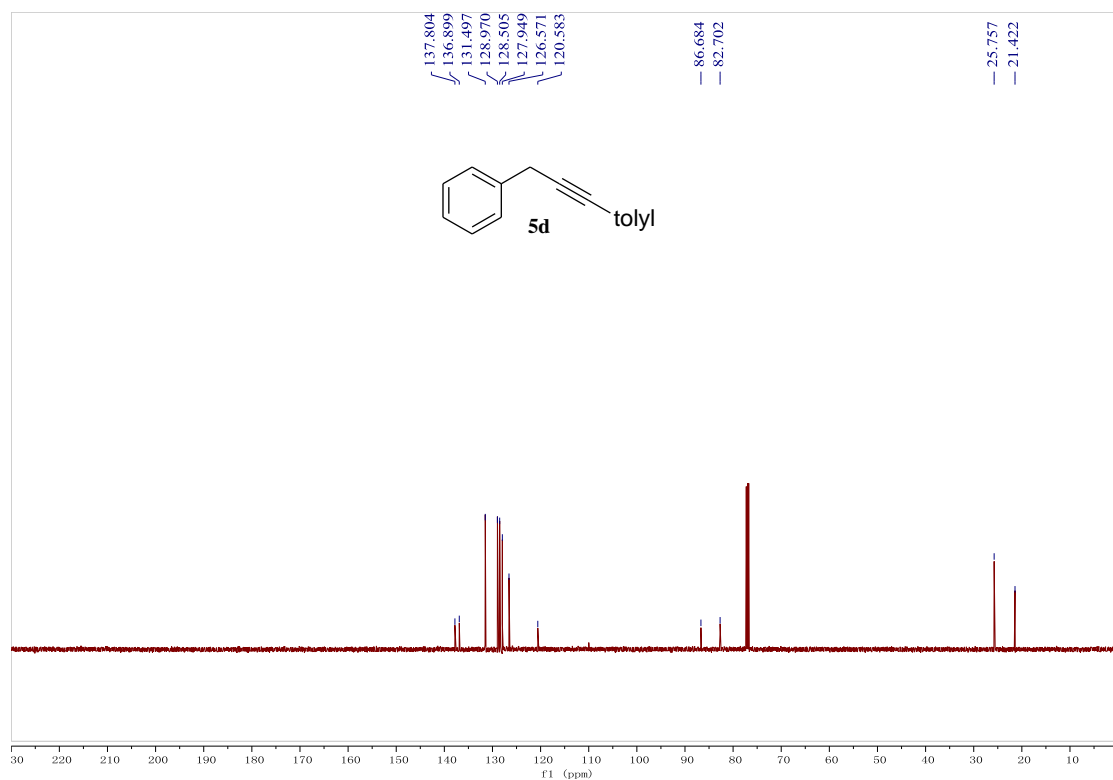

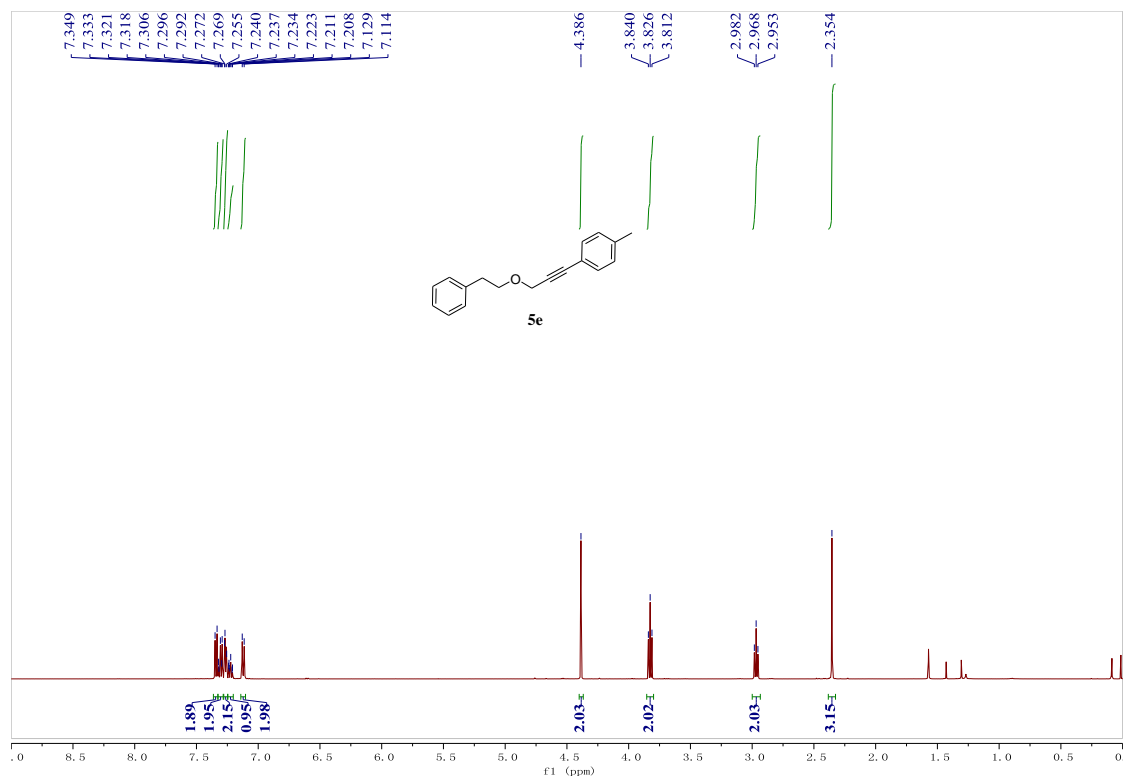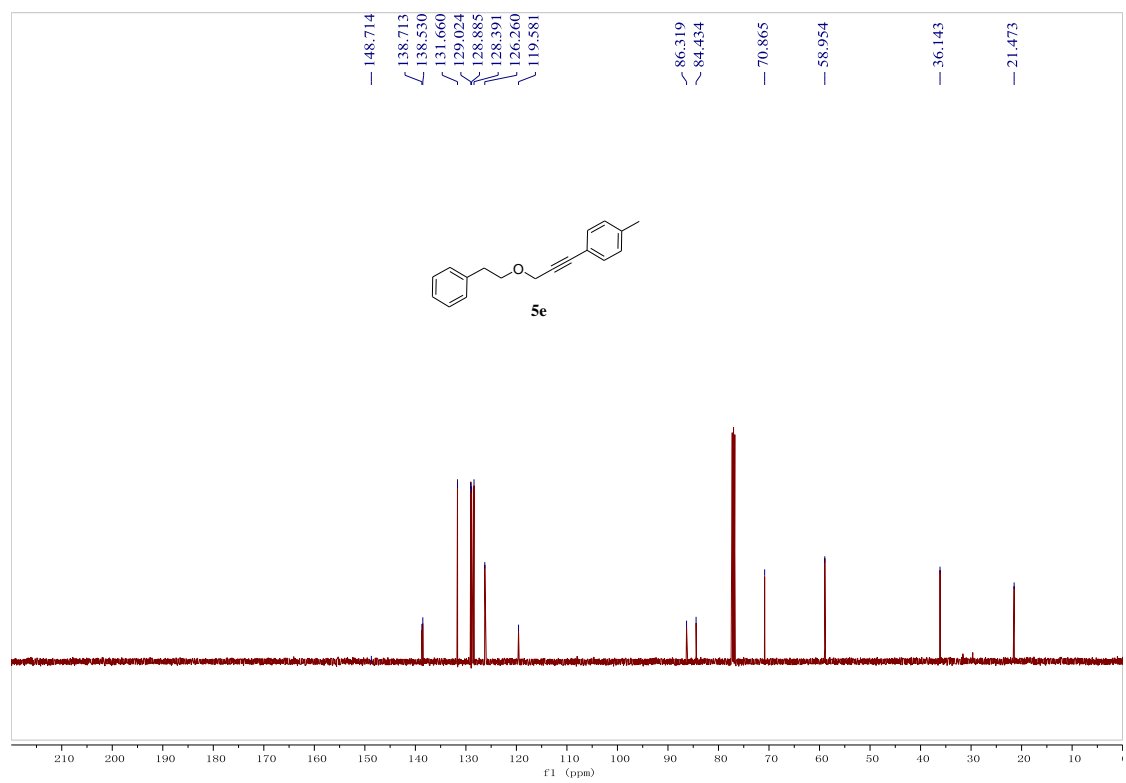



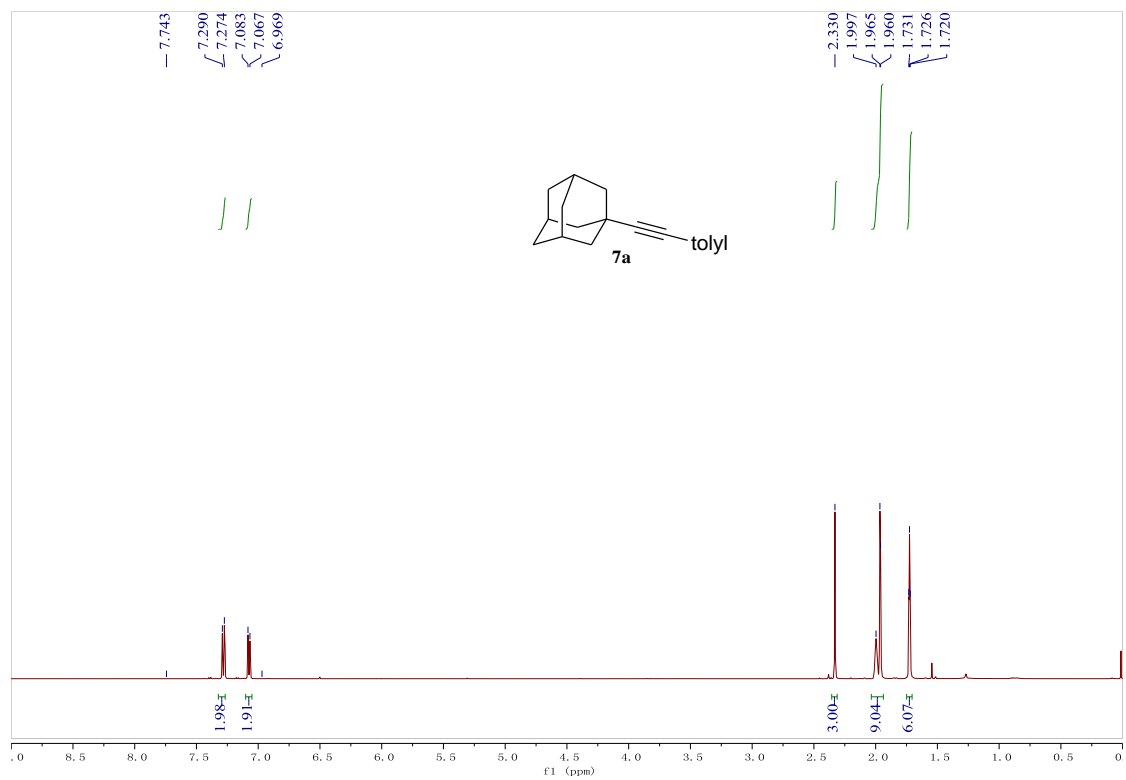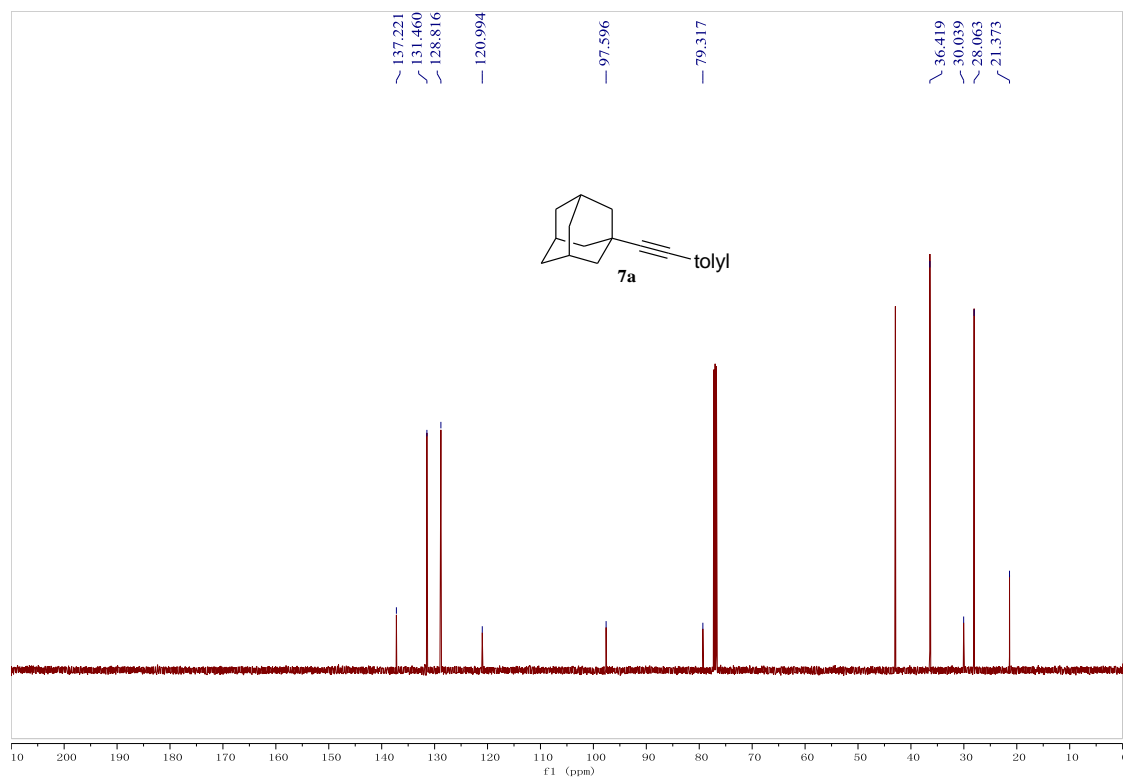

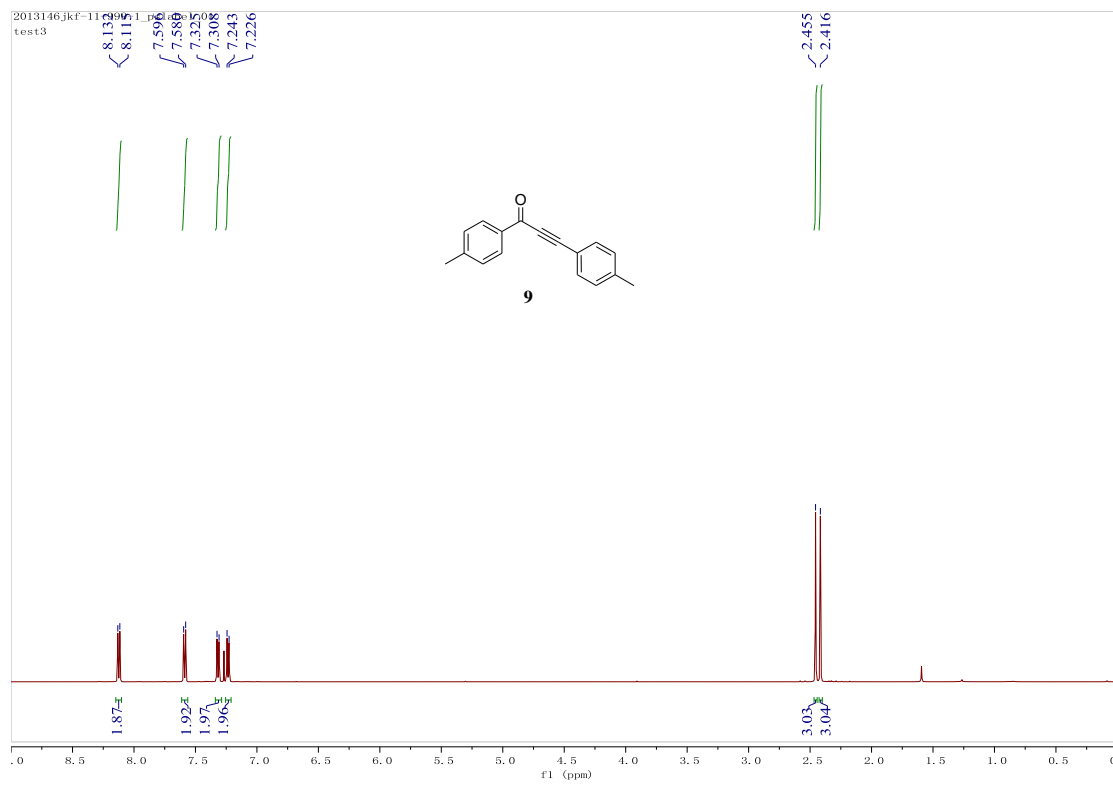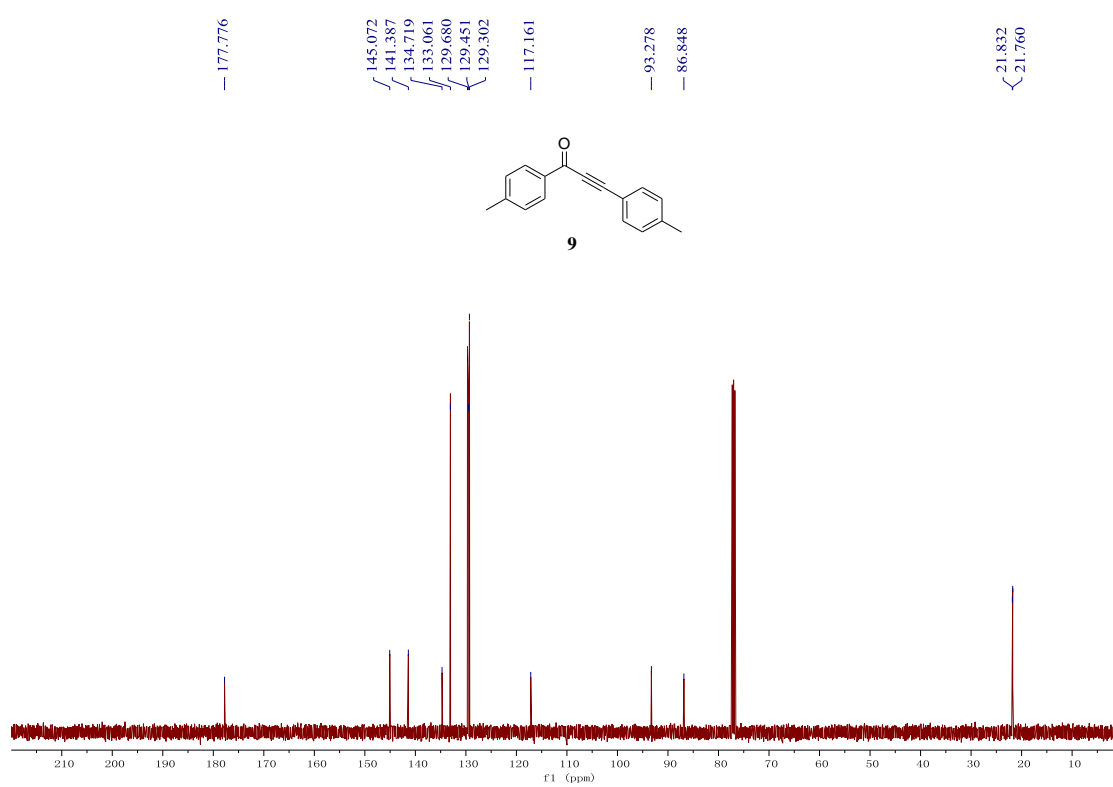

Supplement: Additional file 1 [file 1860-5397-14-103-S1.pdf]
